# Supplementary material for: Identifying performance benchmarks and determinants for reproductive performance and calf survival using a longitudinal field study of cow-calf herds in western Canada
Source: PubMed Central journal article supplement (PMC6662034; doi:10.1371/journal.pone.0219901), 2019-07-18
Supplement: pone.0219901.s002.pdf [file pone.0219901.s002.pdf]

## S2 file. Pregnancy testing and breeding season data.

| ProdID | BreedingYear | CalvingYear | PROVCode | CmrcIcode | NmCowChk | NmCowOpen | NmHeifChk | NmHeifOpen | nmBrdCow | nmBrdHf | BrdStartCowCode | BrdStartHfCode | nmFeAICow | nmFeAIHf | PercAICow | PercAIHf |
|--------|--------------|-------------|----------|-----------|----------|-----------|-----------|------------|----------|---------|-----------------|----------------|-----------|----------|-----------|----------|
| 1      | 2014         | 2015        | 1        | 1         | 260      | 15        | 51        | 1          | 265      | 50      | 4               | 4              | 0         | 0        | 0.00      | 0.00     |
| 1      | 2015         | 2016        | 1        | 1         | 232      | 23        | 48        | 5          | 250      | 48      | 4               | 4              | 0         | 0        | 0.00      | 0.00     |
| 1      | 2016         | 2017        | 1        | 1         | 255      | 20        | 55        | 5          | 255      | 50      | 4               | 4              | 0         | 0        | 0.00      | 0.00     |
| 1      | 2017         | 2018        | 1        | 1         | 106      | 9         |           |            |          |         | 4               |                |           |          |           |          |
| 2      | 2014         | 2015        | 1        | 2         | 1110     | 43        | 35        | 1          | 1096     | 17      | 4               | 4              | 0         | 0        | 0.00      | 0.00     |
| 2      | 2015         | 2016        | 1        | 2         | 1020     | 61        | 22        | 1          | 1020     | 22      | 3               | 4              | 0         | 0        | 0.00      | 0.00     |
| 2      | 2016         | 2017        | 1        | 2         | 1155     | 113       | 38        | 3          | 1155     | 38      | 4               | 4              | 0         | 0        | 0.00      | 0.00     |
| 3      | 2014         | 2015        | 1        | 1         | 346      | 48        | 83        | 18         | 346      | 73      | 4               | 4              | 0         | 0        | 0.00      | 0.00     |
| 3      | 2015         | 2016        | 1        | 1         | 331      | 31        | 121       | 12         | 331      | 121     | 4               | 3              | 0         | 0        | 0.00      | 0.00     |
| 3      | 2016         | 2017        | 1        | 1         | 336      | 30        | 89        | 9          | 336      | 89      | 4               | 3              | 0         | 0        | 0.00      | 0.00     |
| 4      | 2014         | 2015        | 1        | 1         | 355      | 17        | 172       | 54         | 340      | 175     | 4               | 4              | 50        | 25       | 0.15      | 0.14     |
| 4      | 2015         | 2016        | 1        | 1         | 460      | 14        | 174       | 27         | 460      | 174     | 4               | 4              | 0         | 0        | 0.00      | 0.00     |
| 4      | 2016         | 2017        | 1        | 1         | 533      | 39        | 174       | 7          | 533      | 174     | 4               | 4              | 40        | 30       | 0.08      | 0.17     |
| 5      | 2014         | 2015        | 1        | 1         | 130      | 10        | 30        | 2          | 125      | 30      | 3               | 3              | 0         | 0        | 0.00      | 0.00     |
| 5      | 2015         | 2016        | 1        | 1         | 133      | 8         | 31        | 2          | 133      | 32      | 3               | 3              | 0         | 0        | 0.00      | 0.00     |
| 5      | 2016         | 2017        | 1        | 1         | 136      | 4         | 28        | 2          | 136      | 28      | 3               | 3              | 0         | 0        | 0.00      | 0.00     |
| 7      | 2014         | 2015        | 1        | 1         | 300      | 16        | 68        | 7          | 287      | 67      | 3               | 3              | 0         | 0        | 0.00      | 0.00     |
| 7      | 2015         | 2016        | 1        | 1         | 314      | 13        | 94        | 5          | 314      | 94      | 3               | 2              | 0         | 0        | 0.00      | 0.00     |
| 7      | 2016         | 2017        | 1        | 1         | 344      | 16        | 97        | 5          | 344      | 97      | 3               | 2              | 0         | 25       | 0.00      | 0.26     |
| 7      | 2017         | 2018        | 1        | 1         | 367      | 47        | 96        | 6          | 367      | 96      | 3               | 2              | 0         | 0        | 0.00      | 0.00     |
| 9      | 2015         | 2016        | 1        | 2         | 261      | 12        | 34        | 1          | 261      | 34      | 1               | 1              | 72        | 0        | 0.28      | 0.00     |
| 10     | 2015         | 2016        | 2        | 1         | 180      | 15        | 30        | 3          | 180      | 30      | 4               | 4              | 0         | 0        | 0.00      | 0.00     |
| 10     | 2016         | 2017        | 2        | 1         | 187      | 15        | 30        | 4          | 187      | 30      | 4               | 4              | 0         | 0        | 0.00      | 0.00     |
| 11     | 2014         | 2015        | 2        | 1         | 277      | 10        | 49        | 2          | 280      | 32      | 3               | 3              | 0         | 0        | 0.00      | 0.00     |
| 11     | 2015         | 2016        | 2        | 1         | 280      | 23        | 45        | 2          | 283      | 45      | 3               | 3              | 0         | 0        | 0.00      | 0.00     |
| 11     | 2016         | 2017        | 2        | 1         | 284      | 18        | 54        | 4          | 284      | 55      | 3               | 3              | 0         | 0        | 0.00      | 0.00     |
| 11     | 2017         | 2018        | 2        | 1         | 280      | 10        | 53        | 3          | 240      | 53      | 1               | 1              | 0         | 0        | 0.00      | 0.00     |
| 12     | 2014         | 2015        | 1        | 1         | 112      | 10        | 64        | 5          | 108      | 64      | 4               | 3              | 0         | 0        | 0.00      | 0.00     |
| 12     | 2015         | 2016        | 1        | 1         | 160      | 5         | 50        | 2          | 162      | 50      | 4               | 3              | 0         | 0        | 0.00      | 0.00     |
| 12     | 2017         | 2018        | 1        | 1         | 180      | 20        | 62        | 7          | 180      | 63      | 4               | 3              | 0         | 0        | 0.00      | 0.00     |
| 13     | 2016         | 2017        | 3        | 1         | 887      | 114       | 197       | 30         | 880      | 197     | 4               | 4              | 190       | 0        | 0.22      | 0.00     |
| 13     | 2017         | 2018        | 3        | 1         | 854      | 93        | 132       | 20         | 875      | 121     | 4               | 4              | 185       | 0        | 0.21      | 0.00     |
| 15     | 2016         | 2017        | 3        | 2         | 219      | 30        | 120       | 7          | 294      | 124     | 1               | 1              | 127       | 77       | 0.43      | 0.62     |
| 15     | 2017         | 2018        | 3        | 2         | 220      | 20        | 130       | 13         | 190      | 130     | 1               | 1              | 90        | 40       | 0.47      | 0.31     |
| 16     | 2014         | 2015        | 3        | 1         | 225      | 10        | 23        | 1          |          |         | 4               | 4              |           |          |           |          |
| 16     | 2015         | 2016        | 3        | 1         | 250      | 10        | 35        | 1          | 250      | 35      | 3               | 3              |           |          |           |          |
| 16     | 2016         | 2017        | 3        | 1         | 250      | 5         | 50        | 2          | 250      | 50      | 4               | 4              | 0         | 0        | 0.00      | 0.00     |
| 16     | 2017         | 2018        | 3        | 1         | 260      | 5         | 50        | 2          | 260      | 50      | 4               | 4              | 0         | 0        | 0.00      | 0.00     |
| 17     | 2014         | 2015        | 1        | 1         | 167      | 9         | 23        | 0          | 135      | 21      | 3               | 3              | 0         | 0        | 0.00      | 0.00     |
| 17     | 2015         | 2016        | 1        | 1         | 134      | 13        | 23        | 1          | 134      | 23      | 3               | 3              | 0         | 0        | 0.00      | 0.00     |
| 17     | 2016         | 2017        | 1        | 1         | 138      | 8         | 20        | 3          | 138      | 20      | 3               | 3              | 0         | 0        | 0.00      | 0.00     |
| 17     | 2017         | 2018        | 1        | 1         | 135      | 13        | 15        | 0          | 136      | 15      | 3               | 3              | 0         | 0        | 0.00      | 0.00     |
| 18     | 2014         | 2015        | 1        | 1         | 229      | 17        | 60        | 3          | 242      | 60      | 2               | 2              | 0         | 0        | 0.00      | 0.00     |
| 18     | 2015         | 2016        | 1        | 1         | 250      | 12        | 49        | 6          | 271      | 49      | 2               | 2              | 0         | 0        | 0.00      | 0.00     |
| 18     | 2016         | 2017        | 1        | 1         | 217      | 12        | 59        | 13         | 230      | 59      | 2               | 2              | 0         | 0        | 0.00      | 0.00     |
| 18     | 2017         | 2018        | 1        | 1         | 235      | 21        | 55        | 9          | 244      | 56      | 2               | 2              | 0         | 0        | 0.00      | 0.00     |
| 19     | 2014         | 2015        | 3        | 1         | 141      | 5         | 46        | 2          | 155      | 46      | 2               | 2              | 0         | 0        | 0.00      | 0.00     |
| 20     | 2014         | 2015        | 3        | 1         | 497      | 36        | 110       | 14         | 499      | 120     | 3               | 3              | 0         | 0        | 0.00      | 0.00     |
| 20     | 2015         | 2016        | 3        | 1         | 518      | 34        | 105       | 20         | 540      | 105     | 3               | 3              | 0         | 0        | 0.00      | 0.00     |

|    |      |      |   |   |      |     |     |     |      |     |   |   |     |     |      |      |
|----|------|------|---|---|------|-----|-----|-----|------|-----|---|---|-----|-----|------|------|
| 20 | 2016 | 2017 | 3 | 1 | 543  | 42  | 90  | 18  | 539  | 92  | 3 | 3 | 0   | 0   | 0.00 | 0.00 |
| 20 | 2017 | 2018 | 3 | 1 | 537  | 44  | 125 | 27  | 550  | 126 | 3 | 3 | 0   | 0   | 0.00 | 0.00 |
| 21 | 2014 | 2015 | 1 | 1 | 148  | 8   | 36  | 1   | 149  | 36  | 2 | 2 | 0   | 0   | 0.00 | 0.00 |
| 21 | 2015 | 2016 | 1 | 1 | 158  | 13  | 30  | 3   | 160  | 30  | 2 | 4 | 0   | 0   | 0.00 | 0.00 |
| 21 | 2016 | 2017 | 1 | 1 | 159  | 7   | 28  | 2   | 159  | 28  | 2 | 2 | 0   | 0   | 0.00 | 0.00 |
| 21 | 2017 | 2018 | 1 | 1 | 161  | 9   | 39  | 1   | 172  | 39  | 2 | 2 | 0   | 0   | 0.00 | 0.00 |
| 22 | 2014 | 2015 | 2 | 2 | 187  | 16  | 31  | 3   | 204  | 30  | 2 | 2 | 0   | 0   | 0.00 | 0.00 |
| 22 | 2015 | 2016 | 2 | 2 | 184  | 18  | 38  | 6   | 184  | 38  | 2 | 2 | 0   | 0   | 0.00 | 0.00 |
| 22 | 2016 | 2017 | 2 | 2 | 179  | 14  | 35  | 7   | 193  | 35  | 2 | 2 | 0   | 0   | 0.00 | 0.00 |
| 22 | 2017 | 2018 | 2 | 2 | 191  | 20  | 37  | 10  | 191  | 37  | 2 | 2 | 0   | 0   | 0.00 | 0.00 |
| 24 | 2016 | 2017 | 2 | 1 | 290  | 11  | 56  | 1   | 290  | 55  | 4 | 2 | 0   | 50  | 0.00 | 0.91 |
| 24 | 2017 | 2018 | 2 | 1 | 295  | 10  | 33  | 0   | 280  | 50  | 4 | 4 | 0   | 0   | 0.00 | 0.00 |
| 25 | 2014 | 2015 | 2 | 1 | 280  | 13  | 55  | 1   | 288  | 52  | 3 | 3 | 0   | 0   | 0.00 | 0.00 |
| 25 | 2015 | 2016 | 2 | 1 | 359  | 12  | 68  | 3   | 359  | 65  | 3 | 3 | 0   | 0   | 0.00 | 0.00 |
| 25 | 2016 | 2017 | 2 | 1 | 331  | 19  | 104 | 1   | 335  | 117 | 3 | 3 | 0   | 0   | 0.00 | 0.00 |
| 25 | 2017 | 2018 | 2 | 1 | 341  | 9   | 100 | 5   | 340  | 120 | 3 | 3 | 0   | 0   | 0.00 | 0.00 |
| 26 | 2014 | 2015 | 2 | 1 | 173  | 5   | 32  | 6   | 141  | 32  | 2 | 2 | 0   | 0   | 0.00 | 0.00 |
| 26 | 2015 | 2016 | 2 | 1 | 58   | 4   | 31  | 5   | 38   | 31  | 2 | 2 | 0   | 0   | 0.00 | 0.00 |
| 26 | 2016 | 2017 | 2 | 1 | 39   | 4   | 16  | 2   | 39   | 16  | 2 | 2 | 0   | 0   | 0.00 | 0.00 |
| 26 | 2017 | 2018 | 2 | 1 | 46   | 5   | 10  | 2   | 46   | 10  | 2 | 2 | 0   | 0   | 0.00 | 0.00 |
| 30 | 2015 | 2016 | 3 | 1 | 234  | 14  | 56  | 21  | 238  | 56  | 4 | 3 | 208 | 56  | 0.87 | 1.00 |
| 30 | 2016 | 2017 | 3 | 1 | 237  | 21  | 57  | 14  | 237  | 57  | 3 | 3 | 221 | 57  | 0.93 | 1.00 |
| 30 | 2017 | 2018 | 3 | 1 | 303  | 7   | 60  | 5   | 303  | 60  | 3 | 3 | 199 | 60  | 0.66 | 1.00 |
| 32 | 2014 | 2015 | 2 | 1 | 171  | 15  | 60  | 16  | 172  | 65  | 3 | 3 | 0   | 0   | 0.00 | 0.00 |
| 32 | 2015 | 2016 | 2 | 1 | 173  | 28  | 53  | 12  | 189  | 53  | 3 | 3 | 0   | 0   | 0.00 | 0.00 |
| 32 | 2016 | 2017 | 2 | 1 | 180  | 20  | 61  | 13  | 181  | 63  | 3 | 3 | 0   | 0   | 0.00 | 0.00 |
| 32 | 2017 | 2018 | 2 | 1 | 178  | 27  | 49  | 14  | 184  | 49  | 3 | 3 | 0   | 0   | 0.00 | 0.00 |
| 33 | 2014 | 2015 | 2 | 1 | 170  | 16  | 35  | 3   | 160  | 30  | 1 | 1 | 0   | 0   | 0.00 | 0.00 |
| 33 | 2015 | 2016 | 2 | 1 | 160  | 5   | 40  | 4   | 150  | 40  | 1 | 1 | 0   | 30  | 0.00 | 0.75 |
| 33 | 2016 | 2017 | 2 | 1 | 187  | 9   | 40  | 2   | 187  | 40  | 1 | 1 | 0   | 38  | 0.00 | 0.95 |
| 34 | 2014 | 2015 | 2 | 1 | 294  | 15  | 71  | 4   | 285  | 71  | 3 | 3 | 0   | 0   | 0.00 | 0.00 |
| 34 | 2015 | 2016 | 2 | 1 | 295  | 16  | 61  | 1   | 295  | 61  | 3 | 2 | 0   | 0   | 0.00 | 0.00 |
| 36 | 2015 | 2016 | 1 | 1 | 1500 | 120 | 630 | 110 | 1500 | 630 | 4 | 4 | 0   | 300 | 0.00 | 0.48 |
| 38 | 2014 | 2015 | 2 | 2 | 300  | 10  | 100 | 5   | 300  | 90  | 1 | 1 | 50  | 50  | 0.17 | 0.56 |
| 38 | 2015 | 2016 | 2 | 2 | 280  | 10  | 80  | 5   | 250  | 90  | 1 | 1 | 0   | 0   | 0.00 | 0.00 |
| 38 | 2016 | 2017 | 2 | 2 | 339  | 22  | 108 | 5   |      |     | 1 | 1 |     |     |      |      |
| 38 | 2017 | 2018 | 2 | 2 | 360  | 20  | 140 | 3   | 350  | 140 | 1 | 1 | 80  | 90  | 0.23 | 0.64 |
| 39 | 2014 | 2015 | 1 | 1 | 116  | 10  | 20  | 0   | 123  | 20  | 3 | 3 | 0   | 0   | 0.00 | 0.00 |
| 39 | 2015 | 2016 | 1 | 1 | 121  | 11  | 21  | 1   | 122  | 21  | 3 | 3 | 0   | 0   | 0.00 | 0.00 |
| 39 | 2016 | 2017 | 1 | 1 | 117  | 11  | 23  | 2   | 117  | 23  | 3 | 3 | 0   | 0   | 0.00 | 0.00 |
| 41 | 2014 | 2015 | 2 | 1 | 175  | 15  |     |     | 145  | 0   | 1 | 1 | 0   | 0   | 0.00 |      |
| 41 | 2016 | 2017 | 2 | 1 | 190  | 12  | 12  | 5   | 190  | 12  | 1 | 1 | 0   | 0   | 0.00 | 0.00 |
| 42 | 2014 | 2015 | 1 | 1 | 86   | 6   | 12  | 0   | 86   | 12  | 3 | 3 | 0   | 0   | 0.00 | 0.00 |
| 42 | 2015 | 2016 | 1 | 1 | 91   | 3   | 8   | 1   | 91   | 8   | 3 | 3 |     |     |      |      |
| 42 | 2016 | 2017 | 1 | 1 | 96   | 3   | 20  | 3   | 96   | 20  | 3 | 3 | 0   | 0   | 0.00 | 0.00 |
| 42 | 2017 | 2018 | 1 | 1 | 98   | 5   | 10  | 1   | 98   | 10  | 3 | 3 | 0   | 0   | 0.00 | 0.00 |
| 43 | 2014 | 2015 | 1 | 2 | 263  | 23  | 68  | 1   | 269  | 56  | 2 | 2 | 117 | 56  | 0.43 | 1.00 |
| 43 | 2015 | 2016 | 1 | 2 | 272  | 15  | 70  | 7   | 243  | 80  | 2 | 2 | 88  | 73  | 0.36 | 0.91 |
| 43 | 2017 | 2018 | 1 | 2 | 334  | 32  | 117 | 19  | 334  | 117 | 2 | 2 | 161 | 84  | 0.48 | 0.72 |
| 44 | 2014 | 2015 | 2 | 1 | 439  | 28  | 85  | 9   | 414  | 85  | 4 | 4 | 0   | 0   | 0.00 | 0.00 |
| 44 | 2015 | 2016 | 2 | 1 | 447  | 29  | 86  | 10  | 448  | 86  | 4 | 3 | 0   | 0   | 0.00 | 0.00 |
| 44 | 2016 | 2017 | 2 | 1 | 448  | 30  | 80  | 6   | 460  | 81  | 4 | 3 | 0   | 0   | 0.00 | 0.00 |
| 44 | 2017 | 2018 | 2 | 1 | 426  | 26  | 84  | 17  | 430  | 84  | 4 | 3 | 0   | 0   | 0.00 | 0.00 |

|    |      |      |   |   |     |    |     |    |     |     |   |   |     |    |      |      |
|----|------|------|---|---|-----|----|-----|----|-----|-----|---|---|-----|----|------|------|
| 45 | 2014 | 2015 | 1 | 1 | 198 | 10 | 36  | 3  | 198 | 36  | 3 | 3 | 0   | 0  | 0.00 | 0.00 |
| 45 | 2015 | 2016 | 1 | 1 | 196 | 5  | 35  | 3  | 197 | 35  | 3 | 3 | 0   | 0  | 0.00 | 0.00 |
| 45 | 2016 | 2017 | 1 | 1 | 193 | 12 | 60  | 21 | 193 | 60  | 3 | 3 | 0   | 0  | 0.00 | 0.00 |
| 50 | 2017 | 2018 | 2 | 2 |     |    |     | 3  | 330 | 40  | 1 | 1 | 120 | 30 | 0.36 | 0.75 |
| 51 | 2015 | 2016 | 2 | 1 | 171 | 16 | 29  | 1  | 171 | 29  | 3 | 3 | 0   | 0  | 0.00 | 0.00 |
| 51 | 2017 | 2018 | 2 | 1 | 193 | 14 | 39  | 2  | 193 | 39  | 3 | 3 | 0   | 0  | 0.00 | 0.00 |
| 52 | 2014 | 2015 | 2 | 1 | 780 | 60 |     |    | 691 | 0   | 4 |   | 0   | 0  | 0.00 |      |
| 52 | 2015 | 2016 | 2 | 1 | 565 | 74 | 211 | 22 | 565 | 214 | 4 | 4 | 0   | 0  | 0.00 | 0.00 |
| 52 | 2016 | 2017 | 2 | 1 | 575 | 40 | 226 | 29 | 605 | 225 | 4 | 4 | 0   | 0  | 0.00 | 0.00 |
| 53 | 2014 | 2015 | 3 | 1 | 132 | 12 | 10  | 1  | 121 | 14  | 2 | 2 | 0   | 0  | 0.00 | 0.00 |
| 53 | 2015 | 2016 | 3 | 1 | 150 | 15 | 15  | 1  | 135 | 15  | 1 | 1 | 0   | 0  | 0.00 | 0.00 |
| 53 | 2016 | 2017 | 3 | 1 | 134 | 1  | 20  | 0  | 134 | 20  | 1 | 1 | 0   | 0  | 0.00 | 0.00 |
| 53 | 2017 | 2018 | 3 | 1 | 141 | 16 | 15  | 1  | 141 | 15  | 1 | 1 | 0   | 0  | 0.00 | 0.00 |
| 54 | 2014 | 2015 | 3 | 1 | 324 | 13 |     |    | 330 | 0   | 2 |   | 0   | 0  | 0.00 |      |
| 55 | 2014 | 2015 | 2 | 1 | 201 | 13 | 27  | 3  | 190 | 29  | 2 | 2 | 0   | 0  | 0.00 | 0.00 |
| 55 | 2015 | 2016 | 2 | 1 | 220 | 9  |     |    | 220 | 0   | 2 |   | 0   | 0  | 0.00 |      |
| 55 | 2016 | 2017 | 2 | 1 | 225 | 8  | 15  | 0  | 225 |     | 2 |   | 0   | 0  | 0.00 |      |
| 57 | 2014 | 2015 | 2 | 1 | 86  | 5  | 14  | 3  | 147 | 31  | 1 | 1 | 0   | 0  | 0.00 | 0.00 |
| 57 | 2015 | 2016 | 2 | 1 | 152 | 14 | 25  | 6  | 152 | 25  | 1 | 1 | 0   | 0  | 0.00 | 0.00 |
| 57 | 2016 | 2017 | 2 | 1 | 154 | 30 | 31  | 3  | 160 | 31  | 1 | 1 | 0   | 0  | 0.00 | 0.00 |
| 57 | 2017 | 2018 | 2 | 1 | 162 | 22 | 41  | 2  | 163 | 41  | 1 | 1 | 0   | 0  | 0.00 | 0.00 |
| 58 | 2014 | 2015 | 2 | 1 | 141 | 15 | 20  | 1  | 120 | 19  | 2 | 2 | 0   | 0  | 0.00 | 0.00 |
| 58 | 2015 | 2016 | 2 | 1 | 138 | 17 | 24  | 1  | 138 | 24  | 2 | 2 | 0   | 0  | 0.00 | 0.00 |
| 58 | 2016 | 2017 | 2 | 1 | 143 | 8  | 20  | 1  | 143 | 20  | 2 | 2 | 0   | 0  | 0.00 | 0.00 |
| 58 | 2017 | 2018 | 2 | 1 | 167 | 9  | 22  | 4  | 154 | 22  | 1 | 1 | 0   | 0  | 0.00 | 0.00 |
| 60 | 2014 | 2015 | 3 | 1 | 180 | 12 |     |    | 173 | 12  | 4 | 4 | 0   | 0  | 0.00 | 0.00 |
| 60 | 2015 | 2016 | 3 | 1 | 185 | 18 | 12  | 0  | 185 | 12  | 4 | 4 | 0   | 0  | 0.00 | 0.00 |
| 62 | 2014 | 2015 | 1 | 1 | 469 | 25 | 123 | 15 | 490 | 119 | 4 | 4 | 0   | 0  | 0.00 | 0.00 |
| 62 | 2015 | 2016 | 1 | 1 | 493 | 45 | 82  | 12 | 498 | 82  | 4 | 4 | 0   | 0  | 0.00 | 0.00 |
| 62 | 2016 | 2017 | 1 | 1 | 487 | 30 | 330 | 41 | 487 | 330 | 4 | 4 | 0   | 0  | 0.00 | 0.00 |
| 63 | 2014 | 2015 | 2 | 2 | 81  | 4  | 19  | 2  | 84  | 19  | 1 | 1 | 37  | 8  | 0.44 | 0.42 |
| 63 | 2015 | 2016 | 2 | 2 | 89  | 2  | 29  | 7  | 89  | 29  | 1 | 1 | 55  | 24 | 0.62 | 0.83 |
| 63 | 2016 | 2017 | 2 | 2 | 95  | 5  | 30  | 3  | 97  | 30  | 1 | 1 | 37  | 14 | 0.38 | 0.47 |
| 63 | 2017 | 2018 | 2 | 2 | 111 | 2  | 36  | 3  | 114 | 36  | 1 | 1 | 28  | 18 | 0.25 | 0.50 |
| 64 | 2014 | 2015 | 1 | 1 | 137 | 5  | 30  | 0  | 138 | 29  | 4 | 3 | 0   | 29 | 0.00 | 1.00 |
| 64 | 2015 | 2016 | 1 | 1 | 149 | 4  | 28  | 0  | 152 | 29  | 3 | 3 | 60  | 29 | 0.39 | 1.00 |
| 64 | 2016 | 2017 | 1 | 1 | 162 | 3  | 40  | 2  | 162 | 40  | 3 | 3 | 10  | 40 | 0.06 | 1.00 |
| 65 | 2014 | 2015 | 2 | 1 | 142 | 4  | 30  | 2  | 142 | 30  | 3 | 3 | 0   | 0  | 0.00 | 0.00 |
| 65 | 2015 | 2016 | 2 | 1 | 148 | 3  | 22  | 1  | 153 | 22  | 3 | 3 | 0   | 0  | 0.00 | 0.00 |
| 65 | 2016 | 2017 | 2 | 1 | 165 | 7  | 18  | 2  | 165 | 18  | 3 | 3 | 0   | 0  | 0.00 | 0.00 |
| 65 | 2017 | 2018 | 2 | 1 | 161 | 8  | 16  | 8  | 159 | 18  | 3 | 3 | 0   | 0  | 0.00 | 0.00 |
| 66 | 2017 | 2018 | 2 | 2 | 250 | 15 | 46  | 3  | 250 | 46  | 2 | 2 | 36  | 0  | 0.14 | 0.00 |
| 67 | 2014 | 2015 | 1 | 1 | 175 | 10 | 12  | 0  | 165 | 12  | 4 | 4 | 0   | 0  | 0.00 | 0.00 |
| 67 | 2015 | 2016 | 1 | 1 | 173 | 14 | 20  | 0  | 174 | 20  | 4 | 4 | 0   | 0  | 0.00 | 0.00 |
| 68 | 2014 | 2015 | 2 | 1 | 286 | 11 | 35  | 3  | 264 | 35  | 3 | 3 | 0   | 0  | 0.00 | 0.00 |
| 68 | 2015 | 2016 | 2 | 1 | 322 | 24 | 45  | 5  | 334 | 45  | 4 | 3 | 0   | 0  | 0.00 | 0.00 |
| 68 | 2017 | 2018 | 2 | 1 | 297 | 23 | 67  | 2  | 306 | 67  | 4 | 3 | 0   | 0  | 0.00 | 0.00 |
| 69 | 2014 | 2015 | 2 | 2 | 252 | 29 | 53  | 8  | 252 | 54  | 2 | 2 | 58  | 46 | 0.23 | 0.85 |
| 69 | 2015 | 2016 | 2 | 2 | 234 | 11 | 58  | 9  | 235 | 58  | 2 | 2 | 68  | 49 | 0.29 | 0.84 |
| 69 | 2016 | 2017 | 2 | 2 | 250 | 17 | 51  | 9  | 250 | 51  | 2 | 2 | 23  | 47 | 0.09 | 0.92 |
| 69 | 2017 | 2018 | 2 | 2 | 221 | 22 | 52  | 5  | 218 | 52  | 2 | 2 | 21  | 48 | 0.10 | 0.92 |
| 71 | 2014 | 2015 | 2 | 1 | 153 | 9  | 33  | 1  | 127 | 25  | 2 | 2 | 0   | 0  | 0.00 | 0.00 |
| 71 | 2015 | 2016 | 2 | 1 | 165 | 8  | 23  | 1  | 158 | 20  | 2 | 2 | 0   | 0  | 0.00 | 0.00 |

|    |      |      |   |   |      |     |     |    |      |     |   |   |    |     |      |      |
|----|------|------|---|---|------|-----|-----|----|------|-----|---|---|----|-----|------|------|
| 71 | 2016 | 2017 | 2 | 1 | 159  | 9   | 21  | 1  | 140  | 20  | 2 | 2 | 0  | 0   | 0.00 | 0.00 |
| 71 | 2017 | 2018 | 2 | 1 | 148  | 8   | 24  | 1  | 148  | 24  | 1 | 1 | 0  | 0   | 0.00 | 0.00 |
| 73 | 2014 | 2015 | 2 | 1 | 350  | 45  | 147 | 35 | 350  | 147 | 4 | 4 | 0  | 0   | 0.00 | 0.00 |
| 73 | 2015 | 2016 | 2 | 1 | 496  | 40  | 151 | 9  | 498  | 151 | 4 | 4 | 0  | 0   | 0.00 | 0.00 |
| 73 | 2016 | 2017 | 2 | 1 | 810  | 72  | 223 | 40 | 854  | 224 | 4 | 4 | 0  | 0   | 0.00 | 0.00 |
| 73 | 2017 | 2018 | 2 | 1 | 858  | 95  | 265 | 35 | 869  | 266 | 4 | 4 | 0  | 0   | 0.00 | 0.00 |
| 74 | 2014 | 2015 | 3 | 1 | 147  | 11  | 12  | 1  | 140  | 22  | 1 | 1 | 0  | 0   | 0.00 | 0.00 |
| 74 | 2015 | 2016 | 3 | 1 | 140  | 10  | 24  | 0  | 140  | 24  | 1 | 1 | 0  | 0   | 0.00 | 0.00 |
| 74 | 2016 | 2017 | 3 | 1 | 145  | 7   | 20  | 0  | 145  | 20  | 1 | 1 | 0  | 0   | 0.00 | 0.00 |
| 74 | 2017 | 2018 | 3 | 1 | 127  | 3   | 25  | 0  | 127  | 23  | 1 | 1 | 0  | 0   | 0.00 | 0.00 |
| 75 | 2014 | 2015 | 2 | 2 | 2800 | 150 | 450 | 80 | 2500 | 500 | 4 | 4 | 0  | 0   | 0.00 | 0.00 |
| 75 | 2015 | 2016 | 2 | 2 | 2300 | 90  | 360 | 50 | 2300 | 360 | 4 | 4 | 0  | 0   | 0.00 | 0.00 |
| 77 | 2014 | 2015 | 1 | 1 | 188  | 20  | 48  | 1  | 192  | 48  | 1 | 1 | 0  | 0   | 0.00 | 0.00 |
| 77 | 2015 | 2016 | 1 | 1 | 199  | 11  | 36  | 3  | 200  | 36  | 1 | 1 | 0  | 0   | 0.00 | 0.00 |
| 78 | 2014 | 2015 | 2 | 1 | 319  | 30  | 155 | 28 | 336  | 154 | 4 | 4 | 8  | 60  | 0.02 | 0.39 |
| 78 | 2015 | 2016 | 2 | 1 | 315  | 15  | 139 | 15 | 325  | 139 | 4 | 4 | 0  | 54  | 0.00 | 0.39 |
| 78 | 2016 | 2017 | 2 | 1 | 314  | 15  | 32  | 1  | 450  | 32  | 4 | 4 | 0  | 0   | 0.00 | 0.00 |
| 78 | 2017 | 2018 | 2 | 1 | 414  | 38  | 30  | 2  | 468  | 102 | 4 | 4 | 0  | 0   | 0.00 | 0.00 |
| 80 | 2014 | 2015 | 3 | 1 | 165  | 10  | 34  | 0  | 162  | 34  | 2 | 2 | 0  | 0   | 0.00 | 0.00 |
| 80 | 2015 | 2016 | 3 | 1 | 176  | 10  | 26  | 3  | 177  | 26  | 2 | 2 | 0  | 0   | 0.00 | 0.00 |
| 80 | 2016 | 2017 | 3 | 1 | 182  | 4   | 26  | 3  | 182  | 26  | 2 | 2 | 4  | 0   | 0.02 | 0.00 |
| 80 | 2017 | 2018 | 3 | 1 | 185  | 9   | 28  | 1  | 185  | 28  | 2 | 2 | 0  | 0   | 0.00 | 0.00 |
| 81 | 2014 | 2015 | 2 | 1 | 106  | 5   | 24  | 1  | 101  | 20  | 3 | 3 | 0  | 0   | 0.00 | 0.00 |
| 81 | 2015 | 2016 | 2 | 1 | 102  | 6   | 23  | 4  | 110  | 23  | 3 | 3 | 0  | 0   | 0.00 | 0.00 |
| 81 | 2016 | 2017 | 2 | 1 | 101  | 7   | 23  | 1  | 101  | 23  | 3 | 3 | 0  | 0   | 0.00 | 0.00 |
| 83 | 2014 | 2015 | 2 | 1 | 825  | 48  | 170 | 21 | 750  | 175 | 4 | 2 | 0  | 0   | 0.00 | 0.00 |
| 83 | 2015 | 2016 | 2 | 1 |      |     | 260 | 42 | 794  | 270 | 4 | 2 | 0  | 110 | 0.00 | 0.41 |
| 83 | 2016 | 2017 | 2 | 1 | 992  | 28  | 180 | 21 | 992  | 180 | 4 | 2 | 0  | 55  | 0.00 | 0.31 |
| 83 | 2017 | 2018 | 2 | 1 | 850  | 26  | 175 | 30 | 850  | 175 | 4 | 2 | 0  | 120 | 0.00 | 0.69 |
| 84 | 2014 | 2015 | 2 | 2 | 202  | 17  | 48  | 4  | 209  | 46  | 4 | 4 | 0  | 0   | 0.00 | 0.00 |
| 84 | 2015 | 2016 | 2 | 2 | 220  | 11  | 36  | 0  | 220  | 36  | 4 | 4 | 0  | 0   | 0.00 | 0.00 |
| 84 | 2016 | 2017 | 2 | 2 | 237  | 16  | 49  | 6  | 239  | 49  | 4 | 4 | 0  | 0   | 0.00 | 0.00 |
| 84 | 2017 | 2018 | 2 | 2 | 222  | 15  | 60  | 5  | 224  | 60  | 4 | 4 | 0  | 0   | 0.00 | 0.00 |
| 85 | 2014 | 2015 | 2 | 2 | 341  | 27  | 60  | 6  | 339  | 56  | 3 | 3 | 24 | 17  | 0.07 | 0.30 |
| 85 | 2015 | 2016 | 2 | 2 | 436  | 13  | 64  | 4  | 402  | 61  | 1 | 3 | 13 | 29  | 0.03 | 0.48 |
| 85 | 2016 | 2017 | 2 | 2 | 399  | 21  | 144 | 18 | 399  | 144 | 3 | 3 | 0  | 73  | 0.00 | 0.51 |
| 85 | 2017 | 2018 | 2 | 2 | 382  | 33  | 108 | 5  | 377  | 125 | 1 | 1 | 0  | 0   | 0.00 | 0.00 |
| 86 | 2014 | 2015 | 2 | 1 | 1079 | 116 | 380 | 34 | 1087 | 393 | 4 | 4 | 0  | 0   | 0.00 | 0.00 |
| 86 | 2015 | 2016 | 2 | 1 | 1220 | 95  | 305 | 29 | 1225 | 305 | 4 | 4 | 0  | 0   | 0.00 | 0.00 |
| 86 | 2016 | 2017 | 2 | 1 | 1320 | 95  | 342 | 32 | 1340 | 350 | 4 | 4 | 0  | 0   | 0.00 | 0.00 |
| 86 | 2017 | 2018 | 2 | 1 | 1300 | 109 | 347 | 24 | 1300 | 347 | 4 | 4 | 0  | 0   | 0.00 | 0.00 |
| 87 | 2016 | 2017 | 1 | 1 | 198  | 16  | 34  | 1  | 198  | 34  | 3 | 3 | 0  | 0   | 0.00 | 0.00 |
| 89 | 2014 | 2015 | 2 | 1 | 221  | 7   | 103 | 10 | 225  | 106 | 4 | 4 | 0  | 0   | 0.00 | 0.00 |
| 89 | 2015 | 2016 | 2 | 1 | 257  | 10  | 72  | 6  | 257  | 72  | 4 | 4 | 0  | 0   | 0.00 | 0.00 |
| 89 | 2016 | 2017 | 2 | 1 | 280  | 12  | 103 | 8  | 280  | 103 | 4 | 4 | 0  | 0   | 0.00 | 0.00 |
| 91 | 2014 | 2015 | 3 | 2 | 715  | 36  | 73  | 11 | 683  | 73  | 3 | 2 | 0  | 0   | 0.00 | 0.00 |
| 91 | 2016 | 2017 | 3 | 2 | 622  | 36  | 96  | 24 | 624  | 96  | 3 | 3 | 0  | 0   | 0.00 | 0.00 |
| 91 | 2017 | 2018 | 3 | 2 | 482  | 39  | 126 | 13 | 475  | 126 | 1 | 1 | 0  | 0   | 0.00 | 0.00 |
| 92 | 2016 | 2017 | 1 | 1 | 306  | 28  | 115 | 10 | 325  | 115 | 3 | 3 | 0  | 0   | 0.00 | 0.00 |
| 94 | 2015 | 2016 | 1 | 2 | 250  | 4   | 70  | 3  | 248  | 70  | 2 | 1 | 45 | 70  | 0.18 | 1.00 |
| 94 | 2017 | 2018 | 1 | 2 | 243  | 4   | 56  | 1  | 224  | 57  | 1 | 1 | 67 | 57  | 0.30 | 1.00 |
| 95 | 2014 | 2015 | 3 | 2 | 121  | 13  | 47  | 1  | 119  | 41  | 4 | 4 | 65 | 0   | 0.55 | 0.00 |
| 96 | 2014 | 2015 | 2 | 1 | 131  | 7   | 18  | 2  | 130  | 18  | 3 | 3 | 0  | 0   | 0.00 | 0.00 |

|     |      |      |   |   |     |    |     |    |     |     |   |   |     |    |      |      |
|-----|------|------|---|---|-----|----|-----|----|-----|-----|---|---|-----|----|------|------|
| 96  | 2015 | 2016 | 2 | 1 | 131 | 6  | 30  | 3  | 131 | 30  | 3 | 3 | 0   | 0  | 0.00 | 0.00 |
| 97  | 2016 | 2017 | 1 | 1 | 462 | 56 | 204 | 31 | 370 | 130 | 4 | 4 | 0   | 0  | 0.00 | 0.00 |
| 98  | 2014 | 2015 | 1 | 1 | 460 | 22 | 150 | 15 | 465 | 150 | 2 | 2 | 0   | 0  | 0.00 | 0.00 |
| 98  | 2015 | 2016 | 1 | 1 | 470 | 15 | 180 | 16 | 470 | 180 | 2 | 2 | 0   | 0  | 0.00 | 0.00 |
| 98  | 2016 | 2017 | 1 | 1 | 460 | 15 | 178 | 18 | 460 | 178 | 2 | 2 | 0   | 0  | 0.00 | 0.00 |
| 98  | 2017 | 2018 | 1 | 1 | 406 | 14 | 62  | 2  | 460 | 170 | 2 | 2 | 0   | 0  | 0.00 | 0.00 |
| 99  | 2014 | 2015 | 1 | 2 | 110 | 7  | 14  | 1  | 94  | 19  | 4 | 4 | 0   | 0  | 0.00 | 0.00 |
| 99  | 2015 | 2016 | 1 | 2 | 91  | 3  | 19  | 3  | 102 | 19  | 3 | 3 | 0   | 0  | 0.00 | 0.00 |
| 99  | 2016 | 2017 | 1 | 2 | 105 | 10 | 15  | 2  | 105 | 15  | 4 | 4 | 0   | 0  | 0.00 | 0.00 |
| 99  | 2017 | 2018 | 1 | 2 | 108 | 13 | 15  | 1  | 110 | 15  | 4 | 4 | 0   | 0  | 0.00 | 0.00 |
| 100 | 2014 | 2015 | 1 | 2 | 185 | 5  | 10  | 0  | 175 | 12  | 1 | 1 | 0   | 0  | 0.00 | 0.00 |
| 100 | 2016 | 2017 | 1 | 2 | 163 | 2  | 9   | 0  | 163 | 9   | 3 | 3 | 0   | 0  | 0.00 | 0.00 |
| 100 | 2017 | 2018 | 1 | 2 | 155 | 18 | 12  | 0  | 155 | 12  | 3 | 3 | 0   | 0  | 0.00 | 0.00 |
| 101 | 2014 | 2015 | 2 | 2 | 160 | 7  | 5   | 1  | 160 | 5   | 3 | 3 | 0   | 0  | 0.00 | 0.00 |
| 101 | 2015 | 2016 | 2 | 2 | 160 | 6  | 31  | 0  | 160 | 31  | 3 | 3 | 0   | 0  | 0.00 | 0.00 |
| 101 | 2016 | 2017 | 2 | 2 | 198 | 7  | 13  | 0  | 198 | 13  | 1 | 1 | 0   | 0  | 0.00 | 0.00 |
| 101 | 2017 | 2018 | 2 | 2 | 190 | 3  | 65  | 2  | 190 | 65  | 3 | 3 | 0   | 0  | 0.00 | 0.00 |
| 102 | 2014 | 2015 | 3 | 1 | 300 | 26 | 31  | 5  | 310 | 25  | 1 | 1 | 0   | 0  | 0.00 | 0.00 |
| 102 | 2015 | 2016 | 3 | 1 | 280 | 70 | 48  | 25 | 280 | 48  | 1 | 1 | 0   | 0  | 0.00 | 0.00 |
| 102 | 2016 | 2017 | 3 | 1 | 220 | 22 | 65  | 4  | 220 | 65  | 1 | 1 | 0   | 0  | 0.00 | 0.00 |
| 102 | 2017 | 2018 | 3 | 1 | 224 | 7  | 42  | 11 | 225 | 42  | 1 | 1 | 0   | 0  | 0.00 | 0.00 |
| 104 | 2014 | 2015 | 2 | 1 | 268 | 23 | 67  | 10 | 268 | 67  | 1 | 1 | 0   | 0  | 0.00 | 0.00 |
| 104 | 2015 | 2016 | 2 | 1 | 277 | 19 | 74  | 1  | 277 | 74  | 1 | 1 | 0   | 0  | 0.00 | 0.00 |
| 104 | 2016 | 2017 | 2 | 1 | 284 | 19 | 93  | 6  | 284 | 93  | 1 | 1 | 0   | 0  | 0.00 | 0.00 |
| 104 | 2017 | 2018 | 2 | 1 | 275 | 11 | 54  | 7  |     |     | 1 | 1 | 0   | 0  | 0.00 | 0.00 |
| 106 | 2014 | 2015 | 2 | 1 | 74  | 4  | 13  | 1  | 63  | 10  | 3 | 3 | 0   | 0  | 0.00 | 0.00 |
| 106 | 2015 | 2016 | 2 | 1 | 67  | 5  | 10  | 0  | 67  | 10  | 4 | 4 | 0   | 0  | 0.00 | 0.00 |
| 106 | 2016 | 2017 | 2 | 1 | 62  | 3  | 5   | 0  | 62  | 5   | 3 | 3 | 0   | 0  | 0.00 | 0.00 |
| 107 | 2014 | 2015 | 2 | 2 | 136 | 11 | 38  | 9  | 166 | 39  | 1 | 1 | 106 | 16 | 0.64 | 0.41 |
| 107 | 2015 | 2016 | 2 | 2 | 146 | 13 | 67  | 3  | 146 | 67  | 1 | 1 | 120 | 20 | 0.82 | 0.30 |
| 107 | 2016 | 2017 | 2 | 2 | 40  | 5  | 10  | 2  | 40  | 14  | 1 | 1 | 0   | 0  | 0.00 | 0.00 |
| 108 | 2014 | 2015 | 2 | 1 | 304 | 46 | 60  | 2  | 298 | 60  | 1 | 1 | 0   | 0  | 0.00 | 0.00 |
| 108 | 2015 | 2016 | 2 | 1 | 311 | 24 | 67  | 5  | 311 | 67  | 1 | 1 | 0   | 0  | 0.00 | 0.00 |
| 108 | 2016 | 2017 | 2 | 1 | 323 | 35 | 65  | 2  | 323 | 65  | 1 | 1 | 0   | 0  | 0.00 | 0.00 |
| 110 | 2014 | 2015 | 2 | 2 | 115 | 4  | 33  | 3  | 150 | 26  | 1 | 1 | 4   | 0  | 0.03 | 0.00 |
| 110 | 2015 | 2016 | 2 | 2 | 145 | 6  | 26  | 1  | 145 | 24  | 1 | 1 | 4   | 0  | 0.03 | 0.00 |
| 110 | 2016 | 2017 | 2 | 2 | 124 | 8  | 29  | 3  | 116 | 26  | 1 | 1 | 10  | 0  | 0.09 | 0.00 |
| 110 | 2017 | 2018 | 2 | 2 | 132 | 7  | 30  | 0  | 140 | 40  | 1 | 1 | 10  | 10 | 0.07 | 0.25 |
| 111 | 2015 | 2016 | 3 | 2 | 131 | 16 | 33  | 4  | 131 | 33  | 4 | 4 | 0   | 0  | 0.00 | 0.00 |
| 111 | 2016 | 2017 | 3 | 2 | 141 | 15 | 32  | 3  | 141 | 32  | 4 | 4 | 0   | 0  | 0.00 | 0.00 |
| 111 | 2017 | 2018 | 3 | 2 | 65  | 3  | 39  | 1  | 100 | 40  | 4 | 4 | 0   | 0  | 0.00 | 0.00 |
| 112 | 2014 | 2015 | 1 | 1 | 198 | 18 | 48  | 0  | 200 | 48  | 4 | 4 | 0   | 0  | 0.00 | 0.00 |
| 112 | 2015 | 2016 | 1 | 1 | 352 | 14 | 69  | 4  | 355 | 69  | 4 | 4 | 0   | 0  | 0.00 | 0.00 |
| 112 | 2016 | 2017 | 1 | 1 | 375 | 31 |     |    | 376 | 0   | 4 | 4 | 0   | 0  | 0.00 | 0.00 |
| 112 | 2017 | 2018 | 1 | 1 | 324 | 24 | 51  | 4  | 329 | 51  | 4 | 4 | 0   | 0  | 0.00 | 0.00 |
| 113 | 2015 | 2016 | 3 | 1 | 103 | 2  | 12  | 2  | 103 | 12  | 2 | 2 | 0   | 0  | 0.00 | 0.00 |
| 113 | 2016 | 2017 | 3 | 1 | 99  | 11 | 14  | 2  | 110 | 14  | 3 | 3 | 0   | 0  | 0.00 | 0.00 |
| 113 | 2017 | 2018 | 3 | 1 | 81  | 8  | 8   | 1  | 92  | 14  | 3 | 3 | 0   | 0  | 0.00 | 0.00 |
| 114 | 2014 | 2015 | 1 | 1 | 363 | 24 | 63  | 6  | 362 | 71  | 4 | 3 | 0   | 0  | 0.00 | 0.00 |
| 114 | 2015 | 2016 | 1 | 1 | 365 | 21 | 145 | 19 | 365 | 146 | 4 | 3 | 0   | 0  | 0.00 | 0.00 |
| 115 | 2015 | 2016 | 2 | 2 | 137 | 17 | 52  | 2  | 137 | 52  | 4 | 4 | 89  | 52 | 0.65 | 1.00 |
| 118 | 2015 | 2016 | 2 | 1 | 110 | 17 | 51  | 2  | 100 | 50  | 4 | 3 | 0   | 0  | 0.00 | 0.00 |
| 118 | 2016 | 2017 | 2 | 1 | 134 | 8  | 56  | 6  | 128 | 56  | 4 | 3 | 0   | 0  | 0.00 | 0.00 |

|     |      |      |   |   |     |    |     |    |     |     |   |   |   |   |      |      |
|-----|------|------|---|---|-----|----|-----|----|-----|-----|---|---|---|---|------|------|
| 118 | 2017 | 2018 | 2 | 1 | 164 | 17 | 50  | 3  | 164 | 50  | 4 | 3 | 0 | 0 | 0.00 | 0.00 |
| 119 | 2015 | 2016 | 2 | 1 | 458 | 41 | 171 | 34 | 475 | 172 | 4 | 4 | 0 | 0 | 0.00 | 0.00 |
| 119 | 2016 | 2017 | 2 | 1 | 476 | 45 | 145 | 27 | 415 | 130 | 4 | 4 | 0 | 0 | 0.00 | 0.00 |
| 120 | 2015 | 2016 | 2 | 1 | 198 | 6  | 26  | 0  | 198 | 26  | 1 | 1 | 0 | 0 | 0.00 | 0.00 |
| 120 | 2016 | 2017 | 2 | 1 | 203 | 8  | 22  | 1  | 206 | 22  | 1 | 1 | 0 | 0 | 0.00 | 0.00 |
| 120 | 2017 | 2018 | 2 | 1 | 203 | 15 | 24  | 1  | 205 | 24  | 1 | 1 | 0 | 0 | 0.00 | 0.00 |
| 121 | 2016 | 2017 | 2 | 1 | 275 | 10 | 44  | 2  | 276 | 44  | 2 | 2 | 0 | 0 | 0.00 | 0.00 |
| 121 | 2017 | 2018 | 2 | 1 | 293 | 11 | 58  | 9  | 295 | 58  | 2 | 2 | 0 | 0 | 0.00 | 0.00 |
| 123 | 2017 | 2018 | 1 | 1 | 137 | 8  | 30  | 0  | 137 | 30  | 2 | 2 | 0 | 0 | 0.00 | 0.00 |
| 124 | 2017 | 2018 | 1 | 1 | 370 | 12 | 90  | 11 | 360 | 100 | 3 | 3 | 0 | 0 | 0.00 | 0.00 |
| 125 | 2016 | 2017 | 1 | 1 | 165 | 10 | 25  | 0  | 171 | 28  | 4 | 4 | 6 | 2 | 0.04 | 0.07 |
| 125 | 2017 | 2018 | 1 | 1 | 229 | 21 | 34  | 3  | 160 | 35  | 4 | 4 | 5 | 3 | 0.03 | 0.09 |
| 128 | 2016 | 2017 | 3 | 1 | 193 | 31 | 36  | 4  | 193 | 36  | 1 | 1 | 0 | 0 | 0.00 | 0.00 |
| 128 | 2017 | 2018 | 3 | 1 | 181 | 29 | 39  | 10 | 178 | 41  | 1 | 1 | 0 | 0 | 0.00 | 0.00 |
| 129 | 2015 | 2016 | 1 | 1 | 316 | 8  | 46  | 3  | 316 | 46  | 4 | 3 |   |   |      |      |
| 129 | 2016 | 2017 | 1 | 1 | 285 | 4  | 51  | 2  | 285 | 51  | 4 | 3 | 0 | 0 | 0.00 | 0.00 |
| 129 | 2017 | 2018 | 1 | 1 | 282 | 3  | 53  | 4  | 310 | 53  | 4 | 3 | 0 | 0 | 0.00 | 0.00 |
