# Supplementary material for: Identifying performance benchmarks and determinants for reproductive performance and calf survival using a longitudinal field study of cow-calf herds in western Canada
Source: PubMed Central journal article supplement (PMC6662034; doi:10.1371/journal.pone.0219901), 2019-07-18
Supplement: pone.0219901.s003.pdf [file pone.0219901.s003.pdf]

S3 file. Calving season data.

| ProdID | BreedingYear | CalvingYear | PROVCode | CmrcCode | nmCvldCow | nmCvldHF | CLVDGR300 | CLVDGR500 | nmAbrtCow | denAbrtCow | nmAbrtHF | denAbrtHF | nmTwinCow | nmTwinHF | CALVESBORNROWS | nmCvEmDdCow | CALVESBORNHF | nmCvEmDdHF | denCvDdWnCow | nmCvDdWnCow | denCvDdWnHF | nmCvDdWnHF | nmWnCow | nmWnHF | BrdStartCowCode | BrdStartHFCode |
|--------|--------------|-------------|----------|----------|-----------|----------|-----------|-----------|-----------|------------|----------|-----------|-----------|----------|----------------|-------------|--------------|------------|--------------|-------------|-------------|------------|---------|--------|-----------------|----------------|
| 1      | 2013         | 2014        | 1        | 1        | 285       | 25       | 1         | 1         | 7         | 287        | 2        | 27        | 0         | 0        | 974            | 13          | 25           | 1          | 279          | 6           | 266         | 24         | 20      | 4      | 4               |                |
| 2      | 2013         | 2014        | 1        | 2        | 974       | 25       | 1         | 1         | 7         | 281        | 2        | 27        | 0         | 0        | 974            | 13          | 25           | 1          | 279          | 6           | 266         | 24         | 20      | 4      | 4               |                |
| 3      | 2013         | 2014        | 1        | 1        | 168       | 32       | 0         | 0         | 0         | 168        | 1        | 33        | 2         | 0        | 170            | 3           | 1            | 167        | 0            | 31          | 0           | 165        | 31      | 4      | 4               |                |
| 4      | 2013         | 2014        | 1        | 1        | 382       | 120      | 1         | 1         | 3         | 385        | 2        | 122       | 2         | 0        | 384            | 6           | 120          | 4          | 378          | 16          | 116         | 6          | 243     | 111    | 4               | 4              |
| 5      | 2013         | 2014        | 1        | 1        | 101       | 27       | 0         | 0         | 0         | 104        | 1        | 28        | 3         | 1        | 104            | 1           | 28           | 3          | 100          | 3           | 1           | 100        | 27      | 3      | 3               |                |
| 7      | 2013         | 2014        | 1        | 1        | 263       | 59       | 1         | 0         | 1         | 264        | 1        | 60        | 6         | 1        | 269            | 7           | 60           | 6          | 262          | 7           | 54          | 4          | 261     | 49     | 3               | 3              |
| 8      | 2013         | 2014        | 1        | 2        |           |          |           |           |           |            |          |           |           |          |                |             |              |            |              |             |             |            |         |        |                 | 1              |
| 9      | 2013         | 2014        | 1        | 2        | 237       | 26       | 0         | 0         | 1         | 238        | 3        | 29        | 9         | 0        | 246            | 11          | 26           | 3          | 235          | 10          | 23          | 3          | 216     | 21     | 4               | 4              |
| 10     | 2013         | 2014        | 2        | 1        |           |          |           |           |           |            |          |           |           |          |                |             |              |            |              |             |             |            |         |        |                 | 4              |
| 11     | 2013         | 2014        | 2        | 1        | 285       | 17       | 1         | 0         | 3         | 288        | 0        | 17        | 3         | 0        | 288            | 3           | 17           | 1          | 285          | 13          | 16          | 0          | 269     | 15     | 3               | 3              |
| 12     | 2013         | 2014        | 1        | 1        | 134       | 15       | 0         | 0         | 0         | 134        | 0        | 15        | 2         | 0        | 136            | 4           | 15           | 2          | 132          | 2           | 13          | 0          | 128     | 13     | 4               | 4              |
| 13     | 2013         | 2014        | 3        | 1        |           |          |           |           |           |            |          |           |           |          |                |             |              |            |              |             |             |            |         |        |                 | 4              |
| 14     | 2013         | 2014        | 3        | 1        | 135       | 27       | 0         | 0         | 0         | 135        | 0        | 27        | 0         | 0        | 135            | 1           | 27           | 1          | 134          | 2           | 26          | 0          | 133     | 26     | 4               | 4              |
| 15     | 2013         | 2014        | 3        | 2        | 163       | 49       | 0         | 0         | 1         | 164        | 2        | 51        | 7         | 2        | 170            | 8           | 51           | 4          | 162          | 3           | 47          | 3          |         |        | 4               | 4              |
| 16     | 2013         | 2014        | 3        | 1        | 220       | 33       | 0         | 0         | 2         | 222        | 0        | 33        | 5         | 1        | 225            | 0           | 34           | 0          | 225          | 1           | 34          | 0          | 225     | 33     | 4               | 4              |
| 17     | 2013         | 2014        | 1        | 1        | 109       | 16       | 0         | 0         | 0         | 109        | 1        | 17        | 0         | 0        | 109            | 3           | 16           | 1          | 106          | 1           | 15          | 0          | 105     | 15     | 3               | 3              |
| 18     | 2013         | 2014        | 1        | 1        | 203       | 49       | 0         | 0         | 0         | 203        | 1        | 50        | 8         | 0        | 211            | 4           | 49           | 3          | 207          | 5           | 46          | 0          | 202     | 46     | 3               | 3              |
| 19     | 2013         | 2014        | 3        | 1        | 121       | 24       | 0         | 0         | 1         | 122        | 1        | 25        | 3         | 0        | 124            | 3           | 24           | 1          | 121          | 9           | 23          | 1          | 111     | 23     | 2               | 2              |
| 20     | 2013         | 2014        | 3        | 1        | 389       | 86       | 1         | 0         | 3         | 392        | 1        | 87        | 6         | 0        | 395            | 3           | 86           | 3          | 392          | 5           | 83          | 3          | 380     | 84     | 3               | 3              |
| 21     | 2013         | 2014        | 1        | 1        | 131       | 29       | 0         | 0         | 1         | 132        | 0        | 29        | 3         | 0        | 134            | 3           | 29           | 3          | 131          | 1           | 26          | 0          | 129     | 27     | 2               | 2              |
| 22     | 2013         | 2014        | 2        | 2        | 166       | 26       | 0         | 0         | 0         | 166        | 1        | 27        | 3         | 0        | 169            | 3           | 26           | 0          | 166          | 2           | 26          | 0          | 166     | 26     | 2               | 2              |
| 23     | 2013         | 2014        | 2        | 2        | 750       | 120      | 1         | 1         | 5         | 755        | 3        | 123       | 6         | 0        | 756            | 6           | 120          | 6          | 750          | 6           | 114         | 2          | 715     | 115    | 4               | 4              |
| 25     | 2013         | 2014        | 2        | 1        | 255       | 55       | 1         | 0         | 1         | 256        | 0        | 55        | 4         | 1        | 259            | 8           | 56           | 0          | 251          | 2           | 56          | 0          | 248     | 54     | 3               | 3              |
| 26     | 2013         | 2014        | 2        | 1        | 119       | 28       | 0         | 0         | 3         | 122        | 0        | 28        | 3         | 0        | 122            | 3           | 28           | 3          | 119          | 2           | 25          | 0          | 113     | 25     | 2               | 2              |
| 29     | 2013         | 2014        | 2        | 1        |           |          |           |           |           |            |          |           |           |          |                |             |              |            |              |             |             |            |         |        |                 | 3              |
| 30     | 2013         | 2014        | 3        | 1        | 211       | 34       | 0         | 0         | 2         | 213        | 1        | 35        | 3         | 0        | 214            | 6           | 34           | 0          | 208          | 2           | 34          | 0          | 203     | 33     | 3               | 3              |
| 32     | 2013         | 2014        | 2        | 1        | 158       | 36       | 0         | 0         | 4         | 162        | 0        | 36        | 0         | 0        | 158            | 1           | 36           | 3          | 157          | 2           | 33          | 0          | 148     | 19     | 3               | 3              |
| 33     | 2013         | 2014        | 2        | 1        | 140       | 33       | 0         | 0         | 2         | 142        | 0        | 33        | 5         | 2        | 145            | 4           | 35           | 2          | 141          | 4           | 33          | 3          | 135     | 30     | 1               | 1              |
| 34     | 2013         | 2014        | 2        | 1        | 270       | 50       | 1         | 0         | 2         | 272        | 1        | 51        | 6         | 0        | 276            | 12          | 50           | 5          | 264          | 3           | 45          | 1          | 246     | 48     | 3               | 3              |
| 36     | 2013         | 2014        | 1        | 1        |           |          |           |           |           |            |          |           |           |          |                |             |              |            |              |             |             |            |         |        |                 | 4              |
| 37     | 2013         | 2014        | 2        | 1        |           |          |           |           |           |            |          |           |           |          |                |             |              |            |              |             |             |            |         |        |                 | 3              |
| 38     | 2013         | 2014        | 2        | 2        | 226       | 56       | 0         | 0         | 0         | 226        | 0        | 56        | 6         | 0        | 232            | 4           | 56           | 6          | 228          | 7           | 50          | 0          | 200     | 50     | 1               | 1              |
| 39     | 2013         | 2014        | 1        | 1        | 96        | 34       | 0         | 0         | 0         | 96         | 0        | 34        | 2         | 1        | 98             | 3           | 35           | 2          | 95           | 4           | 33          | 0          | 96      | 34     | 3               | 3              |
| 40     | 2013         | 2014        | 2        | 1        |           |          |           |           |           |            |          |           |           |          |                |             |              |            |              |             |             |            |         |        |                 | 1              |
| 41     | 2013         | 2014        | 2        | 1        | 170       | 0        | 0         | 0         | 2         | 172        | 0        | 0         | 2         | 0        | 172            | 0           | 0            | 172        | 2            | 170         | 2           | 0          | 170     | 0      | 1               | 1              |
| 42     | 2013         | 2014        | 1        | 1        | 77        | 7        | 0         | 0         | 1         | 78         | 1        | 8         | 0         | 0        | 77             | 2           | 7            | 0          | 75           | 0           | 7           | 0          | 78      | 6      | 3               | 3              |
| 43     | 2013         | 2014        | 1        | 2        | 259       | 27       | 0         | 0         | 4         | 263        | 0        | 27        | 15        | 1        | 274            | 4           | 28           | 0          | 270          | 4           | 28          | 1          | 234     | 26     | 2               | 2              |
| 44     | 2013         | 2014        | 2        | 1        | 364       | 69       | 0         | 0         | 4         | 364        | 4        | 70        | 6         | 0        | 364            | 7           | 69           | 5          | 362          | 5           | 62          | 0          | 356     | 62     | 4               | 4              |
| 45     | 2013         | 2014        | 1        | 1        | 299       | 63       | 1         | 0         | 0         | 299        | 1        | 64        | 4         | 0        | 303            | 3           | 63           | 1          | 300          | 1           | 63          | 0          | 300     | 63     | 3               | 3              |
| 46     | 2013         | 2014        | 2        | 1        | 300       | 37       | 1         | 0         | 1         | 301        | 0        | 37        | 12        | 3        | 312            | 18          | 40           | 1          | 294          | 7           | 39          | 0          | 289     | 36     | 2               | 2              |
| 48     | 2013         | 2014        | 1        | 1        |           |          |           |           |           |            |          |           |           |          |                |             |              |            |              |             |             |            |         |        |                 | 2              |
| 50     | 2013         | 2014        | 2        | 2        | 348       | 36       | 1         | 0         | 2         | 350        | 1        | 37        | 13        | 2        | 361            | 3           | 38           | 1          | 358          | 16          | 37          | 1          | 358     | 33     | 1               | 1              |
| 51     | 2013         | 2014        | 2        | 1        | 158       | 0        | 0         | 0         | 1         | 159        | 0        | 1         | 0         | 0        | 158            | 2           | 1            | 0          | 156          | 1           | 174         | 1          | 174     | 1      | 3               | 3              |
| 52     | 2013         | 2014        | 2        | 1        | 725       | 0        | 1         | 1         | 0         | 725        | 0        | 0         | 2         | 0        | 727            | 20          | 0            | 0          | 707          | 16          | 0           | 0          | 690     | 0      | 2               | 2              |
| 53     | 2013         | 2014        | 3        | 1        | 115       | 20       | 0         | 0         | 0         | 115        | 0        | 20        | 2         | 0        | 117            | 3           | 20           | 0          | 114          | 2           | 20          | 1          | 114     | 20     | 1               | 1              |
| 54     | 2013         | 2014        | 3        | 1        | 246       | 50       | 1         | 0         | 4         | 247        | 1        | 51        | 9         | 0        | 247            | 5           | 50           | 1          | 245          | 4           | 51          | 1          | 246     | 50     | 1               | 1              |
| 55     | 2013         | 2014        | 2        | 1        | 185       | 35       | 0         | 0         | 5         | 190        | 0        | 35        | 8         | 0        | 193            | 4           | 35           | 2          | 189          | 13          | 33          | 1          | 178     | 33     | 2               | 2              |
| 56     | 2013         | 2014        | 2        | 1        |           |          |           |           |           |            |          |           |           |          |                |             |              |            |              |             |             |            |         |        |                 | 4              |
| 57     | 2013         | 2014        | 2        | 1        | 122       | 29       | 0         | 0         | 2         | 124        | 0        | 29        | 7         | 0        | 129            | 5           | 29           | 2          | 124          | 0           | 27          | 0          | 122     | 29     | 1               | 1              |
| 58     | 2013         | 2014        | 2        | 1        |           |          |           |           |           |            |          |           |           |          |                |             |              |            |              |             |             |            |         |        |                 | 2              |
| 59     | 2013         | 2014        | 2        | 1        |           |          |           |           |           |            |          |           |           |          |                |             |              |            |              |             |             |            |         |        |                 | 2              |
| 60     | 2013         | 2014        | 3        | 1        | 200       | 10       | 0         | 0         | 0         | 200        | 0        | 10        | 0         | 0        | 200            | 8           | 10           | 4          | 192          | 2           | 6           | 0          | 190     | 6      | 4               | 4              |
| 61     | 2013         | 2014        | 2        | 1        | 87        | 41       | 0         | 0         | 0         | 87         | 1        | 42        | 0         | 0        | 88             | 2           | 41           | 4          | 86           | 1           | 37          | 0          | 84      | 36     | 3               | 3              |
| 62     | 2013         | 2014        | 1        | 1        | 421       | 90       | 1         | 1         | 3         | 424        | 0        | 90        | 5         | 1        | 426            | 5           | 91           | 6          | 421          | 3           | 85          | 3          | 408     | 81     | 4               | 4              |
| 63     | 2013         | 2014        | 2        | 2        | 66        | 17       | 0         | 0         | 2         | 68         | 1        | 18        | 3         | 1        | 69             | 5           | 18           | 64         | 17           | 69          | 1           | 60         | 19      | 1      | 1               |                |
| 64     | 2013         | 2014        | 1        | 1        |           |          |           |           |           |            |          |           |           |          |                |             |              |            |              |             |             |            |         |        |                 | 4              |
| 65     | 2013         | 2014        | 2        | 1        | 133       | 27       | 0         | 0         | 2         | 135        | 0        | 27        | 3         | 1        | 136            | 3           | 28           | 0          | 132          | 1           | 28          | 1          | 131     | 26     | 4               | 4              |
| 66     | 2013         | 2014        | 2        | 2        | 211       | 36       | 0         | 0         | 3         | 214        | 1        | 37        | 7         | 0        | 218            | 5           | 36           | 0          | 213          | 1           | 36          | 0          | 206     | 33     | 2               | 2              |
| 67     | 2013         | 2014        | 1        | 1        | 158       | 12       | 0         | 0         | 3         | 161        | 0        | 12        | 1         | 0        | 161            | 1           | 12           | 1          | 157          | 3           | 11          | 0          | 154     | 7      | 4               | 4              |
| 68     | 2013         | 2014        | 2        | 1        | 296       | 26       | 1         | 0         | 2         | 298        | 0        | 26        | 4         | 0        | 300            | 13          | 26           | 4          | 287          | 24          | 22          | 2          | 259     | 21     | 3               | 3              |
| 69     | 2013         | 2014        | 2        | 2        | 218       | 40       | 0         | 0         | 1         | 219        | 0        | 40        | 11        | 0        | 229            | 3           | 40           | 0          | 226          | 5           | 40          | 0          | 214     | 39     | 2               | 2              |
| 71     | 2013         | 2014        | 2        | 1        | 143       | 21       | 0         | 0         | 3         | 146        | 0        | 21        | 8         | 0        | 151            | 3           | 21           | 2          | 148          | 6           | 19          | 2          | 131     | 17     | 2               | 2              |
| 72     | 2013         | 2014        | 3        | 1        |           |          |           |           |           |            |          |           |           |          |                |             |              |            |              |             |             |            |         |        |                 | 4              |
| 73     | 2013         | 2014        | 2        | 1        | 268       | 91       | 1         | 0         | 16        | 284        | 4        | 95        | 10        | 1        | 278            | 7           | 92           | 1          | 271          | 9           | 91          | 1          | 262     | 90     | 4               | 4              |
| 74     | 2013         | 2014        | 3        | 1        | 157       | 20       | 0         | 0         | 1         | 158        | 0        | 20        | 4         | 0        | 161            | 5           | 20           | 0          | 156          | 1           | 20          | 0          | 155     | 20     | 1               | 1              |
| 75     | 2013         | 2014        | 2        | 2        | 2350      | 180      | 1         | 1         | 50        | 2400       | 2        | 182       | 50        | 2        | 2400           | 50          | 182          | 5          | 2350         | 50          | 177         | 16         | 2270    | 160    | 1               | 1              |
| 77     | 2013         | 2014        | 1        | 1        | 147       | 50       | 0         | 0         | 1         | 148        | 0        | 50        | 11        | 0        | 158            | 5           | 50           | 3          | 153          | 5           | 47          | 0          | 149     | 48     | 4               | 4              |
| 78     | 2013         | 2014        | 2        | 1        | 311       | 79       | 1         | 0         | 9         | 320        | 3        | 82        | 8         | 0        | 319            |             |              |            |              |             |             |            |         |        |                 |                |

|    |      |      |   |   |     |     |   |   |   |     |    |     |    |   |     |    |     |    |     |    |     |    |     |     |    |   |   |
|----|------|------|---|---|-----|-----|---|---|---|-----|----|-----|----|---|-----|----|-----|----|-----|----|-----|----|-----|-----|----|---|---|
| 7  | 2014 | 2015 | 1 | 1 | 269 | 61  | 1 | 0 | 2 | 271 | 0  | 61  | 4  | 0 | 273 | 2  | 61  | 3  | 271 | 8  | 58  | 2  | 276 | 54  | 3  | 3 |   |
| 9  | 2014 | 2015 | 1 | 2 | 245 | 18  | 0 | 0 | 0 | 245 | 0  | 18  | 5  | 0 | 250 | 3  | 18  | 1  | 247 | 4  | 17  | 0  | 243 | 17  | 2  | 2 |   |
| 10 | 2014 | 2015 | 2 | 1 | 256 | 24  | 0 | 0 | 0 | 256 | 0  | 24  | 0  | 0 | 256 | 0  | 24  | 1  | 255 | 3  | 0   | 0  | 252 | 34  | 4  | 4 |   |
| 11 | 2014 | 2015 | 2 | 1 | 268 | 47  | 1 | 0 | 1 | 269 | 0  | 47  | 3  | 1 | 271 | 8  | 48  | 2  | 263 | 9  | 46  | 2  | 248 | 44  | 3  | 3 |   |
| 12 | 2014 | 2015 | 1 | 1 | 96  | 58  | 0 | 0 | 0 | 1   | 97 | 0   | 58 | 1 | 0   | 97 | 1   | 58 | 3   | 96 | 1   | 55 | 0   | 95  | 55 | 4 | 3 |
| 14 | 2014 | 2015 | 3 | 1 | 141 | 27  | 0 | 0 | 0 | 141 | 0  | 27  | 1  | 0 | 142 | 2  | 27  | 2  | 140 | 3  | 25  | 1  | 136 | 24  | 4  | 3 |   |
| 15 | 2014 | 2015 | 3 | 2 | 180 | 32  | 0 | 0 | 2 | 182 | 2  | 34  | 13 | 0 | 183 | 2  | 32  | 2  | 181 | 3  | 30  | 3  | 179 | 29  | 1  | 1 |   |
| 16 | 2014 | 2015 | 3 | 1 | 250 | 35  | 0 | 0 | 0 | 250 | 0  | 35  | 7  | 1 | 257 | 5  | 36  | 0  | 252 | 0  | 36  | 0  | 250 | 35  | 4  | 4 |   |
| 17 | 2014 | 2015 | 1 | 1 | 118 | 20  | 0 | 0 | 0 | 118 | 0  | 20  | 1  | 0 | 119 | 1  | 20  | 1  | 118 | 1  | 19  | 0  | 117 | 19  | 3  | 3 |   |
| 18 | 2014 | 2015 | 1 | 1 | 210 | 81  | 0 | 0 | 2 | 212 | 0  | 81  | 9  | 2 | 219 | 11 | 83  | 1  | 208 | 1  | 82  | 1  | 207 | 81  | 2  | 2 |   |
| 19 | 2014 | 2015 | 3 | 1 | 126 | 43  | 0 | 0 | 0 | 126 | 0  | 43  | 6  | 2 | 130 | 6  | 44  | 1  | 124 | 2  | 43  | 0  | 124 | 42  | 2  | 2 |   |
| 20 | 2014 | 2015 | 3 | 1 | 442 | 93  | 1 | 1 | 4 | 446 | 2  | 95  | 7  | 0 | 449 | 8  | 93  | 2  | 441 | 9  | 91  | 2  | 427 | 89  | 3  | 3 |   |
| 21 | 2014 | 2015 | 1 | 1 | 138 | 34  | 0 | 0 | 0 | 138 | 0  | 34  | 5  | 1 | 143 | 1  | 35  | 1  | 142 | 2  | 34  | 1  | 95  | 78  | 2  | 2 |   |
| 22 | 2014 | 2015 | 2 | 2 | 159 | 27  | 0 | 0 | 2 | 161 | 0  | 27  | 2  | 0 | 161 | 3  | 27  | 0  | 158 | 6  | 27  | 0  | 27  | 27  | 2  | 2 |   |
| 23 | 2014 | 2015 | 2 | 2 | 700 | 100 | 1 | 1 | 6 | 706 | 6  | 100 | 13 | 0 | 710 | 6  | 100 | 6  | 704 | 6  | 98  | 2  | 704 | 100 | 4  | 4 |   |
| 25 | 2014 | 2015 | 2 | 1 | 292 | 92  | 1 | 0 | 6 | 298 | 0  | 92  | 4  | 1 | 296 | 5  | 93  | 0  | 291 | 8  | 53  | 0  | 284 | 52  | 3  | 3 |   |
| 26 | 2014 | 2015 | 2 | 1 | 59  | 0   | 0 | 0 | 0 | 59  | 0  | 1   | 2  | 0 | 61  | 2  | 1   | 0  | 59  | 0  | 1   | 0  | 57  | 1   | 2  | 2 |   |
| 29 | 2014 | 2015 | 2 | 1 | 490 | 27  | 1 | 1 | 2 | 492 | 0  | 27  | 4  | 0 | 494 | 6  | 27  | 1  | 488 | 25 | 26  | 2  | 26  | 1   | 1  | 1 |   |
| 30 | 2014 | 2015 | 3 | 1 | 215 | 27  | 0 | 0 | 2 | 217 | 0  | 27  | 1  | 0 | 216 | 6  | 27  | 2  | 210 | 4  | 25  | 0  | 203 | 26  | 4  | 4 |   |
| 32 | 2014 | 2015 | 2 | 1 | 150 | 44  | 0 | 0 | 0 | 150 | 0  | 44  | 1  | 0 | 151 | 2  | 44  | 3  | 149 | 6  | 41  | 3  | 141 | 39  | 3  | 3 |   |
| 33 | 2014 | 2015 | 2 | 1 | 140 | 28  | 0 | 0 | 0 | 140 | 0  | 28  | 6  | 1 | 146 | 6  | 29  | 3  | 140 | 8  | 26  | 2  | 120 | 27  | 1  | 1 |   |
| 34 | 2014 | 2015 | 2 | 1 | 283 | 51  | 1 | 0 | 2 | 285 | 0  | 51  | 9  | 0 | 292 | 5  | 51  | 2  | 287 | 7  | 49  | 1  | 264 | 51  | 3  | 3 |   |
| 36 | 2014 | 2015 | 1 | 1 | 950 | 240 | 1 | 1 | 5 | 955 | 2  | 242 | 8  | 2 | 958 | 25 | 242 | 12 | 933 | 11 | 230 | 6  | 927 | 240 | 4  | 4 |   |
| 38 | 2014 | 2015 | 2 | 2 | 300 | 40  | 1 | 0 | 0 | 300 | 1  | 41  | 3  | 0 | 303 | 9  | 40  | 8  | 294 | 3  | 38  | 3  | 283 | 29  | 1  | 1 |   |
| 39 | 2014 | 2015 | 1 | 1 | 107 | 22  | 0 | 0 | 1 | 108 | 0  | 22  | 5  | 0 | 112 | 1  | 22  | 0  | 111 | 3  | 0   | 0  | 103 | 22  | 3  | 3 |   |
| 41 | 2014 | 2015 | 2 | 1 | 200 | 0   | 0 | 0 | 0 | 200 | 0  | 0   | 3  | 0 | 203 | 2  | 0   | 0  | 201 | 4  | 4   | 0  | 194 | 0   | 1  | 1 |   |
| 42 | 2014 | 2015 | 1 | 1 | 81  | 12  | 0 | 0 | 0 | 81  | 0  | 12  | 1  | 0 | 82  | 1  | 12  | 0  | 81  | 0  | 12  | 0  | 78  | 12  | 3  | 3 |   |
| 43 | 2014 | 2015 | 1 | 2 | 45  | 45  | 0 | 0 | 2 | 233 | 2  | 45  | 15 | 0 | 246 | 43 | 45  | 3  | 238 | 3  | 45  | 0  | 232 | 39  | 2  | 2 |   |
| 44 | 2014 | 2015 | 2 | 1 | 379 | 76  | 1 | 0 | 2 | 381 | 0  | 76  | 3  | 1 | 382 | 4  | 77  | 2  | 378 | 5  | 77  | 2  | 368 | 72  | 4  | 4 |   |
| 45 | 2014 | 2015 | 1 | 1 | 165 | 33  | 0 | 0 | 2 | 167 | 0  | 33  | 0  | 0 | 165 | 4  | 33  | 0  | 161 | 3  | 33  | 0  | 164 | 33  | 3  | 3 |   |
| 46 | 2014 | 2015 | 2 | 1 | 305 | 40  | 1 | 0 | 0 | 305 | 0  | 40  | 14 | 2 | 319 | 18 | 42  | 0  | 301 | 8  | 42  | 0  | 295 | 40  | 2  | 2 |   |
| 50 | 2014 | 2015 | 2 | 2 | 393 | 38  | 1 | 0 | 3 | 398 | 3  | 38  | 11 | 9 | 401 | 9  | 38  | 2  | 386 | 40 | 38  | 2  | 380 | 37  | 1  | 1 |   |
| 51 | 2014 | 2015 | 2 | 1 | 154 | 22  | 0 | 0 | 1 | 155 | 0  | 22  | 7  | 0 | 161 | 5  | 22  | 0  | 156 | 0  | 22  | 0  | 151 | 21  | 3  | 3 |   |
| 52 | 2014 | 2015 | 2 | 1 | 617 | 0   | 1 | 1 | 0 | 617 | 0  | 0   | 1  | 0 | 618 | 20 | 0   | 0  | 598 | 35 | 62  | 0  | 562 | 0   | 4  | 4 |   |
| 53 | 2014 | 2015 | 3 | 1 | 121 | 14  | 0 | 0 | 0 | 121 | 0  | 14  | 7  | 1 | 128 | 3  | 15  | 1  | 125 | 1  | 14  | 0  | 124 | 14  | 2  | 2 |   |
| 54 | 2014 | 2015 | 3 | 2 | 4   | 0   | 1 | 4 | 0 | 306 | 4  | 0   | 11 | 0 | 307 | 11 | 0   | 0  | 308 | 17 | 0   | 0  | 288 | 0   | 1  | 1 |   |
| 55 | 2014 | 2015 | 2 | 1 | 187 | 29  | 0 | 0 | 3 | 190 | 1  | 30  | 5  | 0 | 192 | 3  | 29  | 1  | 189 | 13 | 28  | 0  | 176 | 28  | 2  | 2 |   |
| 57 | 2014 | 2015 | 2 | 1 | 128 | 27  | 0 | 0 | 3 | 131 | 1  | 28  | 15 | 1 | 143 | 5  | 28  | 0  | 138 | 3  | 28  | 0  | 131 | 28  | 1  | 1 |   |
| 58 | 2014 | 2015 | 2 | 1 | 112 | 19  | 0 | 0 | 0 | 112 | 0  | 19  | 8  | 0 | 120 | 4  | 19  | 1  | 116 | 5  | 18  | 0  | 119 | 18  | 2  | 2 |   |
| 60 | 2014 | 2015 | 3 | 1 | 12  | 0   | 0 | 0 | 1 | 184 | 1  | 0   | 1  | 0 | 185 | 1  | 12  | 0  | 181 | 0  | 12  | 0  | 181 | 0   | 1  | 1 |   |
| 61 | 2014 | 2015 | 2 | 1 | 115 | 5   | 0 | 0 | 1 | 116 | 0  | 5   | 1  | 0 | 116 | 0  | 5   | 0  | 115 | 0  | 5   | 0  | 115 | 5   | 3  | 3 |   |
| 62 | 2014 | 2015 | 1 | 1 | 462 | 108 | 1 | 1 | 3 | 465 | 0  | 108 | 9  | 1 | 471 | 20 | 109 | 8  | 451 | 7  | 101 | 3  | 442 | 99  | 4  | 4 |   |
| 63 | 2014 | 2015 | 2 | 1 | 77  | 14  | 0 | 0 | 0 | 77  | 0  | 14  | 3  | 0 | 80  | 6  | 14  | 1  | 74  | 5  | 13  | 1  | 69  | 14  | 1  | 1 |   |
| 64 | 2014 | 2015 | 1 | 1 | 208 | 28  | 0 | 0 | 1 | 216 | 0  | 28  | 3  | 0 | 227 | 3  | 29  | 2  | 214 | 3  | 27  | 0  | 211 | 27  | 4  | 4 |   |
| 65 | 2014 | 2015 | 2 | 1 | 136 | 26  | 0 | 0 | 1 | 137 | 0  | 26  | 5  | 0 | 141 | 0  | 26  | 1  | 138 | 2  | 25  | 0  | 129 | 25  | 3  | 3 |   |
| 66 | 2014 | 2015 | 2 | 2 | 199 | 38  | 0 | 0 | 3 | 202 | 0  | 38  | 8  | 0 | 207 | 2  | 38  | 0  | 205 | 4  | 38  | 1  | 200 | 37  | 2  | 2 |   |
| 67 | 2014 | 2015 | 1 | 1 | 155 | 28  | 0 | 0 | 1 | 156 | 2  | 30  | 1  | 0 | 158 | 2  | 28  | 2  | 153 | 3  | 26  | 1  | 150 | 25  | 4  | 4 |   |
| 68 | 2014 | 2015 | 2 | 1 | 336 | 32  | 1 | 0 | 2 | 338 | 0  | 32  | 2  | 0 | 338 | 13 | 32  | 0  | 325 | 8  | 32  | 1  | 313 | 31  | 3  | 3 |   |
| 69 | 2014 | 2015 | 2 | 2 | 193 | 45  | 0 | 0 | 0 | 193 | 0  | 45  | 16 | 2 | 206 | 4  | 45  | 4  | 193 | 4  | 44  | 0  | 192 | 44  | 2  | 2 |   |
| 71 | 2014 | 2015 | 2 | 1 | 127 | 25  | 0 | 0 | 2 | 129 | 0  | 25  | 7  | 2 | 134 | 2  | 25  | 2  | 132 | 3  | 23  | 1  | 122 | 22  | 2  | 2 |   |
| 73 | 2014 | 2015 | 2 | 1 | 296 | 173 | 1 | 0 | 1 | 297 | 0  | 173 | 4  | 0 | 300 | 4  | 173 | 5  | 296 | 4  | 168 | 1  | 292 | 168 | 4  | 4 |   |
| 74 | 2014 | 2015 | 3 | 1 | 137 | 20  | 0 | 0 | 2 | 139 | 0  | 20  | 4  | 0 | 141 | 3  | 20  | 0  | 136 | 1  | 20  | 0  | 136 | 20  | 1  | 1 |   |
| 75 | 2014 | 2015 | 2 | 2 | 200 | 40  | 0 | 0 | 0 | 200 | 0  | 40  | 5  | 0 | 200 | 3  | 40  | 0  | 200 | 3  | 40  | 0  | 200 | 40  | 4  | 4 |   |
| 77 | 2014 | 2015 | 1 | 1 | 164 | 45  | 0 | 0 | 2 | 166 | 0  | 45  | 5  | 1 | 169 | 0  | 45  | 5  | 166 | 5  | 44  | 0  | 156 | 43  | 1  | 1 |   |
| 78 | 2014 | 2015 | 2 | 1 | 275 | 55  | 1 | 0 | 5 | 280 | 2  | 57  | 3  | 0 | 278 | 2  | 55  | 0  | 276 | 1  | 55  | 0  | 272 | 55  | 4  | 4 |   |
| 80 | 2014 | 2015 | 3 | 1 | 150 | 31  | 0 | 0 | 0 | 152 | 3  | 34  | 5  | 1 | 155 | 0  | 32  | 0  | 155 | 4  | 31  | 1  | 142 | 31  | 2  | 2 |   |
| 81 | 2014 | 2015 | 2 | 1 | 91  | 19  | 0 | 0 | 0 | 91  | 0  | 19  | 3  | 0 | 91  | 1  | 19  | 0  | 91  | 2  | 19  | 0  | 91  | 19  | 3  | 3 |   |
| 83 | 2014 | 2015 | 2 | 1 | 683 | 146 | 1 | 1 | 5 | 688 | 2  | 148 | 10 | 3 | 693 | 11 | 149 | 5  | 682 | 16 | 144 | 12 | 662 | 132 | 4  | 2 |   |
| 84 | 2014 | 2015 | 2 | 2 | 184 | 42  | 0 | 0 | 0 | 184 | 0  | 42  | 6  | 0 | 190 | 2  | 42  | 1  | 188 | 4  | 41  | 0  | 181 | 40  | 4  | 4 |   |
| 85 | 2014 | 2015 | 2 | 2 | 372 | 75  | 1 | 0 | 7 | 379 | 2  | 77  | 4  | 1 | 376 | 3  | 75  | 0  | 373 | 17 | 76  | 7  | 338 | 69  | 3  | 3 |   |
| 86 | 2014 | 2015 | 2 | 1 | 341 | 346 | 1 | 1 | 6 | 347 | 6  | 346 | 13 | 5 | 354 | 7  | 346 | 14 | 337 | 10 | 346 | 10 | 879 | 316 | 4  | 4 |   |
| 87 | 2014 | 2015 | 1 | 1 | 146 | 25  | 0 | 0 | 0 | 146 | 0  | 25  | 2  | 0 | 148 | 3  | 25  | 2  | 145 | 3  | 23  | 0  | 145 | 25  | 3  | 3 |   |
| 89 | 2014 | 2015 | 2 | 1 | 209 | 56  | 0 | 0 | 0 | 209 | 1  | 57  | 4  | 0 | 213 | 3  | 56  | 3  | 210 | 1  | 53  | 1  | 207 | 56  | 4  | 4 |   |
| 90 | 2014 | 2015 | 2 | 1 | 145 | 26  | 0 | 0 | 2 | 147 | 0  | 26  | 6  | 1 | 151 | 7  | 27  | 0  | 144 | 2  | 27  | 0  | 126 | 24  | 2  | 2 |   |
| 91 | 2014 | 2015 | 3 | 2 | 545 | 61  | 1 | 7 | 2 | 552 | 6  | 61  | 23 | 0 | 557 | 18 | 61  | 7  | 550 | 3  | 61  | 6  | 543 | 58  | 2  | 2 |   |
| 92 | 2014 | 2015 | 1 | 1 | 267 | 65  | 1 |   |   |     |    |     |    |   |     |    |     |    |     |    |     |    |     |     |    |   |   |



|     |      |      |   |   |      |     |   |   |    |      |    |     |    |    |      |    |     |    |      |     |     |     |      |     |    |   |   |
|-----|------|------|---|---|------|-----|---|---|----|------|----|-----|----|----|------|----|-----|----|------|-----|-----|-----|------|-----|----|---|---|
| 14  | 2016 | 2017 | 3 | 1 | 156  | 25  | 0 | 0 | 3  | 159  | 0  | 25  | 0  | 0  | 156  | 6  | 25  | 1  | 130  | 1   | 24  | 0   | 129  | 25  | 3  | 3 |   |
| 15  | 2016 | 2017 | 3 | 2 | 196  | 56  | 0 | 0 | 1  | 197  | 2  | 58  | 13 | 1  | 209  | 15 | 57  | 9  | 182  | 5   | 37  | 0   | 177  | 37  | 1  | 1 |   |
| 17  | 2016 | 2017 | 1 | 1 | 218  | 20  | 0 | 0 | 0  | 219  | 0  | 25  | 1  | 0  | 220  | 4  | 20  | 1  | 113  | 2   | 18  | 0   | 111  | 38  | 3  | 3 |   |
| 18  | 2016 | 2017 | 1 | 1 | 200  | 40  | 0 | 0 | 6  | 206  | 0  | 40  | 7  | 0  | 207  | 4  | 40  | 1  | 200  | 8   | 42  | 0   | 188  | 41  | 2  | 2 |   |
| 19  | 2016 | 2017 | 3 | 1 | 168  | 47  | 0 | 0 | 0  | 177  | 0  | 48  | 3  | 0  | 180  | 4  | 4   | 0  | 179  | 3   | 41  | 0   | 178  | 41  | 2  | 2 |   |
| 20  | 2016 | 2017 | 3 | 1 | 496  | 67  | 1 | 1 | 2  | 501  | 1  | 68  | 5  | 0  | 504  | 4  | 67  | 0  | 501  | 7   | 67  | 2   | 494  | 68  | 3  | 3 |   |
| 21  | 2016 | 2017 | 1 | 1 | 150  | 26  | 0 | 0 | 2  | 152  | 0  | 26  | 2  | 0  | 152  | 6  | 26  | 0  | 144  | 2   | 26  | 0   | 146  | 24  | 2  | 2 |   |
| 22  | 2016 | 2017 | 2 | 2 | 171  | 30  | 0 | 0 | 1  | 173  | 0  | 30  | 1  | 0  | 173  | 1  | 30  | 2  | 171  | 3   | 28  | 2   | 168  | 26  | 2  | 2 |   |
| 23  | 2016 | 2017 | 2 | 2 |      |     |   |   |    | 750  |    | 120 | 6  | 0  | 756  | 18 | 120 | 6  |      |     |     |     |      |     | 4  | 2 |   |
| 24  | 2016 | 2017 | 2 | 1 | 230  | 54  | 0 | 0 | 2  | 235  | 1  | 55  | 2  | 0  | 235  | 4  | 54  | 2  | 278  | 2   | 45  | 5   | 280  | 42  | 4  | 2 |   |
| 25  | 2016 | 2017 | 2 | 1 | 298  | 20  | 0 | 0 | 2  | 305  | 0  | 35  | 1  | 0  | 305  | 20 | 35  | 0  | 310  | 2   | 18  | 0   | 308  | 38  | 3  | 3 |   |
| 26  | 2016 | 2017 | 2 | 1 | 32   | 14  | 0 | 0 | 0  | 32   | 0  | 14  | 2  | 0  | 34   | 2  | 14  | 0  | 32   | 0   | 14  | 0   | 32   | 14  | 2  | 2 |   |
| 30  | 2016 | 2017 | 3 | 1 | 207  | 94  | 1 | 0 | 1  | 208  | 0  | 96  | 2  | 1  | 209  | 3  | 97  | 2  | 209  | 5   | 89  | 2   |      |     | 3  | 3 |   |
| 32  | 2016 | 2017 | 2 | 1 | 153  | 46  | 0 | 0 | 2  | 155  | 1  | 47  | 1  | 0  | 154  | 2  | 46  | 0  | 145  | 5   | 43  | 0   | 139  | 40  | 3  | 3 |   |
| 33  | 2016 | 2017 | 2 | 1 |      |     |   |   |    |      |    |     |    |    |      |    |     |    |      |     |     |     |      |     | 1  | 1 |   |
| 36  | 2016 | 2017 | 1 | 1 | 219  | 276 | 1 | 0 | 1  | 221  | 4  | 284 | 3  | 3  | 223  | 1  | 283 | 2  | 350  | 8   | 370 | 12  |      |     | 1  | 1 |   |
| 38  | 2016 | 2017 | 2 | 2 | 271  | 89  | 1 | 0 | 1  | 272  | 0  | 89  | 7  | 2  | 278  | 2  | 91  | 2  | 250  | 15  | 86  | 2   | 231  | 84  | 1  | 1 |   |
| 39  | 2016 | 2017 | 1 | 1 | 107  | 30  | 0 | 0 | 0  | 108  | 0  | 31  | 1  | 2  | 109  | 1  | 33  | 1  | 108  | 2   | 31  | 2   | 106  | 29  | 3  | 3 |   |
| 41  | 2016 | 2017 | 2 | 1 | 170  | 30  | 0 | 0 | 0  | 170  | 0  | 30  | 3  | 0  | 173  | 0  | 30  | 0  |      |     |     |     |      |     | 1  | 1 |   |
| 42  | 2016 | 2017 | 1 | 1 | 102  | 11  | 0 | 0 | 0  | 102  | 0  | 11  | 1  | 0  | 103  | 0  | 11  | 0  | 90   | 2   | 11  | 0   | 96   | 10  | 3  | 3 |   |
| 43  | 2016 | 2017 | 1 | 2 | 270  | 66  | 1 | 0 | 3  | 280  | 0  | 66  | 8  | 0  | 285  | 10 | 66  | 4  | 256  | 10  | 71  | 3   | 227  | 74  | 2  | 2 |   |
| 44  | 2016 | 2017 | 2 | 1 | 364  | 74  | 1 | 0 | 2  | 366  | 2  | 74  | 10 | 1  | 374  | 5  | 73  | 0  | 363  | 8   | 73  | 1   | 352  | 72  | 4  | 3 |   |
| 45  | 2016 | 2017 | 1 | 1 | 173  | 32  | 0 | 0 | 0  | 174  | 1  | 34  | 4  | 1  | 178  | 1  | 34  | 0  | 177  | 3   | 32  | 0   | 175  | 32  | 3  | 3 |   |
| 46  | 2016 | 2017 | 2 | 1 | 300  | 49  | 1 | 0 | 3  | 315  | 0  | 49  | 13 | 0  | 325  | 2  | 49  | 0  | 292  | 5   | 42  | 0   | 318  | 42  | 2  | 2 |   |
| 50  | 2016 | 2017 | 2 | 2 | 288  | 38  | 1 | 0 | 2  | 300  | 2  | 42  | 5  | 2  | 303  | 4  | 38  | 2  | 315  | 10  | 42  | 4   | 280  | 34  | 1  | 1 |   |
| 51  | 2016 | 2017 | 2 | 1 | 151  | 43  | 0 | 0 | 0  | 152  | 0  | 43  | 0  | 1  | 152  | 1  | 44  | 2  | 151  | 0   | 41  | 0   | 151  | 41  | 3  | 3 |   |
| 52  | 2016 | 2017 | 2 | 1 | 500  | 190 | 1 | 1 | 1  | 520  | 1  | 200 | 1  | 1  | 521  | 19 | 201 | 17 | 0    | 121 | 3   | 18  |      | 125 | 19 | 4 | 4 |
| 53  | 2016 | 2017 | 3 | 1 | 218  | 20  | 0 | 0 | 2  | 220  | 2  | 24  | 14 | 0  | 220  | 6  | 20  | 0  | 218  | 3   | 20  | 0   |      |     | 1  | 1 |   |
| 54  | 2016 | 2017 | 3 | 1 | 278  | 110 | 1 | 0 | 5  | 289  | 0  | 112 | 8  | 0  | 292  | 5  | 112 | 3  | 303  | 4   | 80  | 20  | 273  | 52  | 2  | 1 |   |
| 57  | 2016 | 2017 | 2 | 1 | 116  | 47  | 0 | 0 | 1  | 117  | 1  | 48  | 9  | 0  | 125  | 7  | 47  | 0  | 119  | 1   | 47  | 1   | 118  | 46  | 1  | 1 |   |
| 58  | 2016 | 2017 | 2 | 1 | 134  | 19  | 0 | 0 | 0  | 134  | 0  | 19  | 4  | 0  | 138  | 3  | 19  | 0  | 132  | 7   | 19  | 1   | 127  | 18  | 2  | 2 |   |
| 62  | 2016 | 2017 | 1 | 1 | 413  | 121 | 1 | 4 | 4  | 425  | 2  | 125 | 7  | 2  | 430  | 4  | 125 | 8  | 413  | 4   | 121 | 4   | 427  | 8   | 4  | 4 |   |
| 63  | 2016 | 2017 | 2 | 1 | 78   | 26  | 0 | 0 | 1  | 79   | 0  | 26  | 4  | 0  | 82   | 0  | 27  | 0  | 82   | 5   | 27  | 1   | 77   | 26  | 1  | 1 |   |
| 65  | 2016 | 2017 | 2 | 1 | 154  | 16  | 0 | 0 | 3  | 166  | 0  | 18  | 2  | 0  | 165  | 3  | 18  | 0  | 150  | 5   | 16  | 1   | 149  | 15  | 3  | 3 |   |
| 66  | 2016 | 2017 | 2 | 2 | 206  | 39  | 0 | 0 | 3  | 209  | 3  | 42  | 8  | 0  | 214  | 4  | 39  | 1  | 210  | 4   | 37  | 1   | 205  | 37  | 2  | 2 |   |
| 68  | 2016 | 2017 | 2 | 1 | 427  | 47  | 0 | 0 | 1  | 431  | 1  | 51  | 4  | 0  | 435  | 5  | 47  | 7  | 425  | 3   | 45  | 3   | 413  | 40  | 3  | 3 |   |
| 69  | 2016 | 2017 | 2 | 2 | 187  | 39  | 0 | 0 | 1  | 188  | 3  | 42  | 12 | 0  | 199  | 6  | 39  | 0  | 194  | 9   | 39  | 2   | 183  | 37  | 2  | 2 |   |
| 71  | 2016 | 2017 | 2 | 1 | 140  | 29  | 0 | 0 | 2  | 144  | 1  | 30  | 4  | 0  | 146  | 6  | 29  | 2  | 133  | 9   | 27  | 1   | 129  | 22  | 2  | 2 |   |
| 73  | 2016 | 2017 | 2 | 1 | 696  | 179 | 1 | 1 | 2  | 713  | 2  | 182 | 13 | 1  | 724  | 15 | 181 | 17 | 694  | 15  | 173 | 5   | 679  | 168 | 4  | 4 |   |
| 74  | 2016 | 2017 | 3 | 1 | 144  | 18  | 0 | 0 | 0  | 144  | 0  | 18  | 3  | 0  | 147  | 3  | 18  | 0  | 127  | 6   | 18  | 0   | 127  | 18  | 4  | 4 |   |
| 75  | 2016 | 2017 | 2 | 2 | 2130 | 395 | 1 | 1 | 60 | 2220 | 10 | 410 | 30 | 4  | 2190 | 15 | 404 | 5  | 2080 | 35  | 380 | 5   | 2050 | 375 | 4  | 4 |   |
| 77  | 2016 | 2017 | 1 | 1 | 154  | 56  | 0 | 0 | 2  | 156  | 3  | 59  | 4  | 1  | 158  | 2  | 57  | 3  | 161  | 2   | 53  | 1   | 158  | 53  | 1  | 1 |   |
| 78  | 2016 | 2017 | 2 | 1 | 434  | 40  | 1 | 0 | 7  | 441  | 1  | 41  | 7  | 1  | 441  | 3  | 41  | 0  | 473  | 6   | 30  | 1   | 437  | 30  | 4  | 4 |   |
| 80  | 2016 | 2017 | 3 | 1 | 160  | 23  | 0 | 0 | 0  | 160  | 0  | 23  | 6  | 0  | 166  | 1  | 23  | 1  | 160  | 2   | 22  | 0   | 158  | 22  | 2  | 2 |   |
| 81  | 2016 | 2017 | 2 | 1 | 95   | 23  | 0 | 0 | 1  | 95   | 0  | 23  | 4  | 0  | 98   | 2  | 23  | 0  | 96   | 3   | 21  | 1   | 95   | 21  | 3  | 3 |   |
| 83  | 2016 | 2017 | 2 | 1 | 957  | 148 | 1 | 1 | 4  | 965  | 2  | 150 | 22 | 4  | 983  | 8  | 152 | 3  | 711  | 15  | 141 | 6   | 704  | 142 | 4  | 2 |   |
| 84  | 2016 | 2017 | 2 | 2 | 190  | 41  | 0 | 0 | 1  | 192  | 0  | 41  | 4  | 0  | 195  | 4  | 41  | 5  | 190  | 3   | 36  | 1   | 187  | 35  | 4  | 4 |   |
| 85  | 2016 | 2017 | 2 | 2 | 422  |     | 1 | 5 | 0  | 427  |    | 7   |    | 0  | 429  |    | 7   | 0  | 434  |     | 25  | 120 | 12   | 0   | 3  | 3 |   |
| 86  | 2016 | 2017 | 2 | 1 | 1188 | 49  | 1 | 1 | 11 | 1192 | 3  | 212 | 22 | 5  | 1203 | 30 | 214 | 10 | 1152 | 64  | 190 | 11  | 1091 | 179 | 4  | 4 |   |
| 89  | 2016 | 2017 | 2 | 1 | 222  | 83  | 1 | 0 | 0  | 222  | 0  | 83  | 3  | 0  | 225  | 0  | 83  | 3  | 250  | 4   | 69  | 2   | 250  | 60  | 4  | 4 |   |
| 90  | 2016 | 2017 | 2 | 1 | 124  | 31  | 0 | 0 | 0  | 124  | 0  | 31  | 4  | 1  | 128  | 8  | 32  | 0  | 124  | 2   | 26  | 34  | 128  | 32  | 1  | 2 |   |
| 91  | 2016 | 2017 | 3 | 2 | 482  | 68  | 1 | 1 | 4  | 486  | 2  | 70  | 32 | 0  | 514  | 6  | 68  | 2  | 482  | 12  | 68  | 4   | 497  | 63  | 3  | 3 |   |
| 92  | 2016 | 2017 | 1 | 1 | 270  | 65  | 1 | 0 | 5  | 278  | 2  | 67  | 14 | 0  | 277  | 4  | 65  | 2  | 266  | 1   | 64  | 1   | 264  | 62  | 3  | 3 |   |
| 94  | 2016 | 2017 | 1 | 2 | 213  | 66  | 0 | 0 | 6  | 219  | 4  | 70  | 4  | 1  | 217  | 8  | 67  | 2  | 263  | 30  | 224 |     |      |     | 2  | 1 |   |
| 95  | 2016 | 2017 | 3 | 2 | 116  | 71  | 0 | 0 | 2  | 118  | 4  | 75  | 3  | 1  | 119  | 0  | 72  | 2  |      |     |     |     |      |     |    |   |   |
| 96  | 2016 | 2017 | 2 | 1 | 134  | 22  | 0 | 0 | 1  | 135  | 0  | 22  | 2  | 0  | 136  | 0  | 22  | 0  | 133  | 2   | 22  | 0   | 131  | 22  | 3  | 3 |   |
| 97  | 2016 | 2017 | 1 | 1 | 390  | 168 | 1 | 1 | 4  | 400  | 0  | 173 | 0  | 0  | 400  | 10 | 173 | 5  | 390  | 5   | 170 | 0   | 345  | 168 | 4  | 4 |   |
| 98  | 2016 | 2017 | 1 | 1 | 420  | 63  | 1 | 0 | 3  | 425  | 2  | 65  | 6  | 1  | 428  | 2  | 64  | 1  | 415  | 10  | 64  | 2   | 404  | 62  | 2  | 2 |   |
| 99  | 2016 | 2017 | 1 | 2 | 105  | 13  | 0 | 0 | 0  | 105  | 0  | 13  | 0  | 0  | 105  | 2  | 13  | 0  | 89   | 5   | 15  | 0   | 90   | 14  | 4  | 4 |   |
| 100 | 2016 | 2017 | 1 | 2 | 135  | 12  | 0 | 0 | 0  | 153  | 0  | 12  | 5  | 0  | 158  | 1  | 12  | 0  | 152  | 4   | 11  | 0   | 148  | 11  | 3  | 3 |   |
| 101 | 2016 | 2017 | 2 | 2 | 199  | 20  | 0 | 0 | 3  | 202  | 1  | 20  | 1  | 1  | 200  | 4  | 21  | 1  | 175  | 10  | 18  | 0   | 164  | 19  | 1  | 1 |   |
| 102 | 2016 | 2017 | 3 | 1 | 165  | 46  | 0 | 0 | 2  | 187  | 1  | 50  | 15 | 2  | 200  | 3  | 51  | 0  | 172  | 5   | 43  | 0   | 162  | 65  | 3  | 3 |   |
| 103 | 2016 | 2017 | 2 | 2 |      |     |   |   |    |      |    |     |    |    |      |    |     |    |      |     |     |     |      |     |    |   |   |
| 104 | 2016 | 2017 | 2 | 1 | 281  |     | 0 | 0 | 8  | 289  |    | 3   |    | 0  | 284  | 14 |     | 0  |      | 16  |     | 20  | 188  | 58  | 1  | 1 |   |
| 106 | 2016 | 2017 | 2 | 1 | 60   | 5   | 0 | 0 | 64 | 0    | 5  | 1   | 0  | 65 | 1    | 5  | 0   | 58 | 4    | 5   | 0   | 49  | 9    | 3   | 3  |   |   |
| 107 | 2016 | 2017 | 2 | 2 | 34   | 9   | 0 | 0 | 0  | 38   | 0  | 9   | 2  | 0  | 40   | 1  | 9   | 0  | 45   | 2   |     |     | 43   | 0   | 1  | 1 |   |
| 108 | 2016 | 2017 | 2 | 1 |      |     |   |   |    |      |    |     |    |    |      |    |     |    |      |     |     |     |      |     |    |   |   |
